# Supplementary material
Source: PubMed Central journal article supplement (PMC3368132)
Supplement: mmc1.pdf [file mmc1.pdf]

Supporting materials for the article

# **Self Complementarity within Proteins: Bridging the Gap between Binding and Folding**

by

Sankar Basu<sup>†</sup>, Dhananjay Bhattacharyya<sup>‡</sup> and Rahul Banerjee<sup>†\*</sup>

<sup>†</sup>Crystallography and Molecular Biology Division, Saha Institute of Nuclear Physics, 1/AF Bidhannagar, Kolkata – 700 064, India

<sup>‡</sup>Biophysics Division, Saha Institute of Nuclear Physics, 1/AF Bidhannagar, Kolkata – 700 064, India

**Dataset S1. The database (DB2) used for the computation of electrostatic complementarity.** PDB ID and chain identifier (underscored) for each polypeptide chain is given under its respective protein class. This database is a subset of a larger database (**DB1**) discussed in detail in a previous report (**1**). As in **DB1**, in case of multiple occupancies of atoms the highest occupancy was used in the calculation and the first conformer for equal occupancies. Proteins with metal ions as an integral part of their structure (given in parentheses) were determined by viewing the structures in RasMol (<http://www.umass.edu/microbio/rasmol>) and also taking into account the buffering conditions whilst crystallization.

### **all $\alpha$ :**

1C02\_B, 1C1K\_A, 1EL4\_A, 1ELK\_B, 1EYH\_A, 1EZJ\_A (Ca<sup>+2</sup>), 1G5N\_A (Ca<sup>+2</sup>), 1G8E\_A, 1I8O\_A, 1JKV\_A (Ca<sup>+2</sup>, Mn<sup>+3</sup>), 1LJ9\_A, 1M0J\_A (Fe<sup>+3</sup>), 1MXR\_B (Fe<sup>+3</sup>, Hg<sup>+2</sup>), 1OOH\_B, 1OXJ\_A, 1Q08\_A (Zn<sup>+2</sup>), 1Q5Z\_A, 1QYZ\_A, 1R1T\_B, 1R5Z\_B, 1R7J\_A, 1SZH\_A, 1TFJ\_A, 1U2W\_B (Zn<sup>+2</sup>), 1U84\_A, 1UCR\_B, 1WPA\_A, 1WXC\_A, 1ZKR\_A, 2A61\_A, 2AIB\_A, 2B8I\_A, 2BA2\_C, 2CWL\_A, 2D48\_A, 2D4X\_A, 2DPO\_A, 2E1N\_B, 2ERB\_A, 2F2B\_A, 2FBQ\_A, 2FD5\_A, 2FMM\_E, 2FP1\_A, 2FU4\_A, 2GXG\_A, 2HRA\_A, 2I3F\_B, 2IC6\_B, 2IGP\_A, 2IMI\_B, 2NZ7\_B, 2O37\_A, 2O70\_F, 2OEB\_A, 2OQG\_C, 2PQR\_B, 2QRW\_K, 2QSA\_A, 2RKN\_A (Zn<sup>+2</sup>), 3B9W\_A, 3BS7\_B, 3C1D\_B, 3CHM\_A, 3DHZ\_B (Fe<sup>+2</sup>).

### **all $\beta$ :**

1DJR\_H, 1DMH\_B (Fe<sup>+3</sup>), 1EZG\_B, 1F7D\_A, 1I0R\_B, 1I4U\_A, 1IBY\_B (Cu<sup>+2</sup>), 1J71\_A, 1K12\_A (Ca<sup>+2</sup>), 1KJL\_A, 1KT6\_A, 1KZQ\_B, 1LR5\_C (Zn<sup>+2</sup>), 1LSL\_A, 1LXZ\_A, 1LYQ\_B, 1NTV\_A, 1NYK\_B, 1NYW\_B, 1OU8\_B, 1P3C\_A, 1PXD\_A, 1QB5\_E, 1QXM\_A, 1R77\_B, 1R8O\_A, 1ROC\_A, 1RU4\_A (Ca<sup>+2</sup>), 1S1D\_A (Ca<sup>+2</sup>), 1SE0\_A (Zn<sup>+2</sup>), 1T2W\_C, 1TH7\_L, 1V8H\_A, 1VM9\_A, 1WD3\_A, 1WLG\_B, 1WLI\_B, 1WS7\_A, 1XU1\_B, 1YFQ\_A (Ca<sup>+2</sup>), 1YOA\_A, 1Z3T\_A, 1ZVT\_B, 2A6V\_A, 2AYD\_A (Zn<sup>+2</sup>), 2D37\_A, 2DCY\_C, 2DP9\_A, 2DUR\_A (Ca<sup>+2</sup>), 2EI5\_A, 2ERF\_A, 2ET1\_A (Mn<sup>+2</sup>), 2F6E\_A, 2G9F\_A, 2GGV\_B, 2GH2\_A (Fe<sup>+3</sup>), 2HAL\_A, 2ICC\_A, 2IQY\_A (Ca<sup>+2</sup>), 2O8L\_A, 2OFZ\_A, 2OR7\_B, 2PA7\_A, 2PCX\_A (Zn<sup>+2</sup>), 2R5O\_A, 2RJ2\_A, 3BOV\_A, 3BU1\_A, 3D9X\_C, 3F5R\_A.

### **$\alpha$ | $\beta$ :**

1DJ0\_A, 1EKG\_A, 1EQ6\_A, 1F1U\_A, 1F46\_B, 1F5M\_B, 1G1T\_A (Ca<sup>+2</sup>), 1G2R\_A, 1IQZ\_A, 1J1G\_A, 1J1Y\_A, 1J27\_A, 1J3W\_B, 1JD5\_A (Zn<sup>+2</sup>), 1JYH\_A, 1JYO\_B, 1K2A\_A, 1KJO\_A (Zn<sup>+2</sup>, Ca<sup>+2</sup>), 1KQB\_C, 1KUX\_A, 1LN4\_A, 1LO7\_A, 1LQP\_B, 1M4D\_A, 1M4J\_B, 1NE9\_A, 1NWA\_A, 1NWW\_B, 1OZ9\_A, 1PC4\_A, 1PPV\_B (Mg<sup>+2</sup>, Mn<sup>+2</sup>), 1R29\_A, 1R45\_A, 1RC9\_A, 1RKI\_A, 1RWZ\_A, 1S5U\_E, 1TA8\_A, 1TKE\_A, 1TP6\_A, 1TR0\_I, 1TU1\_A, 1TUA\_A,

1TUH\_A, 1TUV\_A, 1WRI\_A, 1XBI\_A, 1XMT\_A, 1XPP\_D, 1Y60\_D, 1YAR\_D, 1YGT\_A, 1YPY\_A, 1YWM\_A, 1Z4R\_A, 1ZDY\_A, 1ZHQ\_G, 1ZH\_X\_A, 1ZT3\_A, 2A15\_A, 2AAL\_A, 2ACY\_A, 2B18\_A, 2BBE\_A, 2CVE\_A, 2DT4\_A, 2E11\_B, 2E12\_A, 2E8G\_B, 2EA1\_A, 2FHZ\_A, 2FJR\_B, 2FL4\_A, 2FVV\_A, 2FYG\_A (Zn<sup>+2</sup>), 2G64\_A (Zn<sup>+2</sup>), 2G8O\_A, 2GEB\_A (Ca<sup>+2</sup>), 2GH5\_B, 2GHT\_A, 2GMN\_B (Zn<sup>+2</sup>), 2GU3\_A, 2GWM\_A, 2H2Z\_A, 2I2Q\_A, 2I7D\_A, 2IF6\_A, 2IG8\_B, 2NR7\_A, 2NTT\_B, 2O28\_A, 2OH5\_A, 2P0W\_A, 2P2O\_B, 2P3H\_A, 2PLQ\_A, 2PU3\_A, 2Q0L\_B, 2QKP\_B, 2Z51\_A, 3BJK\_C, 3BK8\_A, 3C8I\_B, 3COU\_A, 3DA4\_A, 3DHA\_A (Zn<sup>+2</sup>).

### **$\alpha + \beta$ :**

1C7N\_C, 1DGF\_B, 1DJE\_A, 1DQZ\_B, 1EQC\_A, 1EU8\_A, 1F8M\_B, 1G5T\_A, 1G8A\_A, 1I2A\_A, 1I2K\_A, 1I5G\_A, 1I6W\_B, 1I9C\_B, 1IM5\_A (Zn<sup>+2</sup>), 1INL\_C, 1IZC\_A, 1JAY\_B, 1JF\_A, 1JKE\_C (Zn<sup>+2</sup>), 1JX6\_A (Ca<sup>+2</sup>), 1K4M\_B, 1K7C\_A, 1LOK\_A (Zn<sup>+2</sup>), 1LUA\_B, 1LWD\_B, 1N3Y\_A, 1NF9\_A, 1O04\_G, 1OOE\_B, 1OZN\_A, 1P6O\_B (Zn<sup>+2</sup>, Ca<sup>+2</sup>), 1Q7L\_A (Zn<sup>+2</sup>), 1RKU\_B, 1SG0\_B (Zn<sup>+2</sup>), 1SW5\_B, 1T1V\_B, 1TJY\_A, 1TP9\_B, 1TVP\_A, 1UB3\_B, 1UC7\_A, 1UEH\_B, 1UG6\_A, 1UK8\_A, 1V2X\_A, 1V37\_A, 1VFL\_A (Zn<sup>+2</sup>), 1WN5\_B, 1WO8\_A, 1WOU\_A, 1WPN\_A, 1WXI\_B, 1XBY\_A, 1XQ6\_B, 1XS5\_A, 1XX1\_B, 1Y1P\_A, 1Y1T\_A, 1Y6V\_A, 1YB6\_A, 1YD0\_A, 1YN9\_B, 1YQZ\_B, 1YZX\_B, 1ZL0\_A, 1ZOI\_C, 1ZR6\_A (Zn<sup>+2</sup>), 1ZX0\_C, 1ZZG\_A, 1ZZW\_B, 2A14\_A, 2A1I\_A, 2ACF\_C, 2AEU\_A, 2AGD\_B, 2AP1\_A (Zn<sup>+2</sup>), 2AVD\_B, 2B1K\_A, 2B3F\_B, 2B82\_A, 2CYG\_A, 2E5F\_A, 2FB9\_A, 2FLA\_A, 2FQX\_A, 2FY6\_A, 2G84\_A (Zn<sup>+2</sup>), 2GSO\_A (Zn<sup>+2</sup>), 2H1C\_A, 2H1V\_A, 2HC9\_A (Zn<sup>+2</sup>), 2HL6\_B, 2HOR\_A, 2HPJ\_A, 2HRC\_B, 2HU9\_A, 2HXU\_A (Mg<sup>+2</sup>), 2HY5\_B, 2HZL\_B, 2I49\_A, 2I56\_C (Zn<sup>+2</sup>), 2NZX\_C, 2OUI\_B, 2P51\_A (Mg<sup>+2</sup>), 2PS1\_A, 2QDX\_A, 2QUL\_B (Mn<sup>+2</sup>), 2REM\_C, 2RHJ\_A, 2YW3\_D, 2Z1Y\_B, 2Z6R\_B, 3B4U\_B, 3B8X\_B, 3BJE\_B (Ca<sup>+2</sup>), 3BOE\_A, 3C9H\_B, 3CQ5\_B, 3D2H\_A, 3DAF\_A (Fe<sup>+2</sup>), 3E96\_B, 3ES7\_B (Mg<sup>+2</sup>), 3EVF\_A.

### **multidomain:**

1DLJ\_A, 1EEJ\_B, 1F60\_A, 1FP2\_A, 1FW1\_A, 1G8L\_B, 1HM9\_B (Ca<sup>+2</sup>), 1HYO\_B (Ca<sup>+2</sup>), 1IG3\_A, 1JAK\_A, 1K7I\_A (Zn<sup>+2</sup>, Ca<sup>+2</sup>), 1KTB\_A, 1LBV\_A, 1M1H\_A, 1OWL\_A, 1P1M\_A, 1RA0\_A (Fe<sup>+3</sup>), 1RQP\_C, 1SZN\_A, 1T0F\_A, 1T2D\_A, 1T4B\_B, 1U60\_C, 1VBK\_A, 1YU0\_A (Ca<sup>+2</sup>), 1Z6F\_A, 1ZJC\_A (Co<sup>+2</sup>), 2CZ1\_B, 2GA2\_A (Mn<sup>+2</sup>), 2GDQ\_B, 2GGO\_A, 2GZ1\_B, 2GZJ\_F (Zn<sup>+2</sup>), 2PUZ\_B (Fe<sup>+3</sup>), 3ETJ\_A (Mg<sup>+2</sup>).

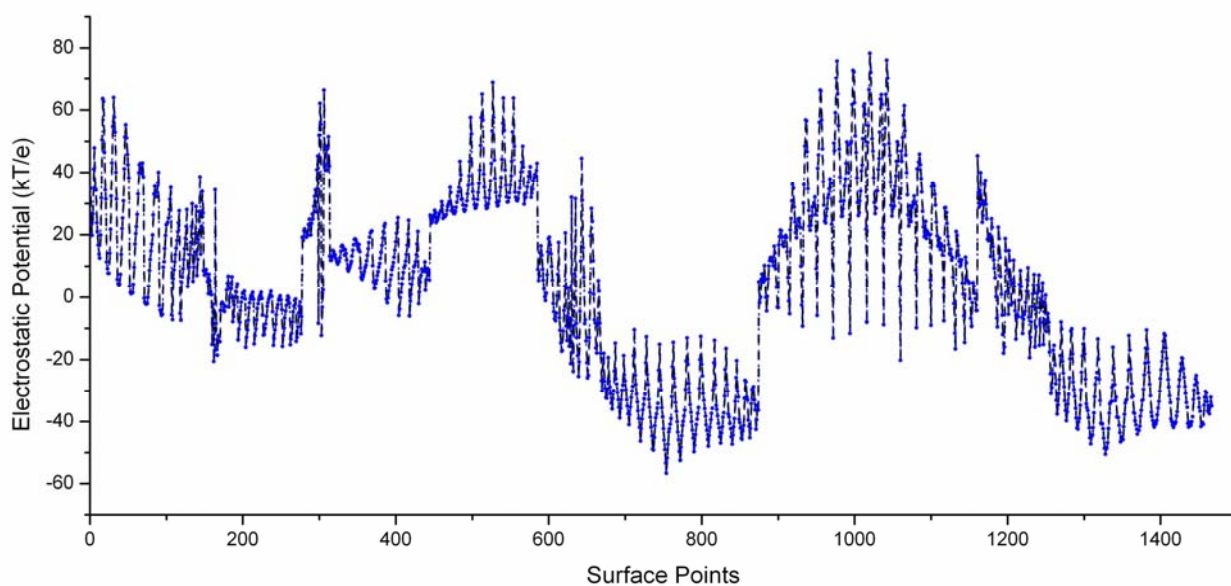

**Figure S1. Electrostatic potentials computed by linearized Poisson-Boltzmann equation (at zero ionic strength) and non-linear PBE at physiological counter-ionic strength (0.15 M NaCl) are virtually identical.** Potentials calculated on individual surface points of a completely buried asparagine (58-Asn: 2HAQ) plotted in **blue:** LPBE; **black:** nonlinear PBE. The plot shows practically identical values in potential (obtained from the two methods) realized due to the atoms of the selected residue. Similar agreement has also been obtained for potentials realized due to the rest of the charged protein atoms.

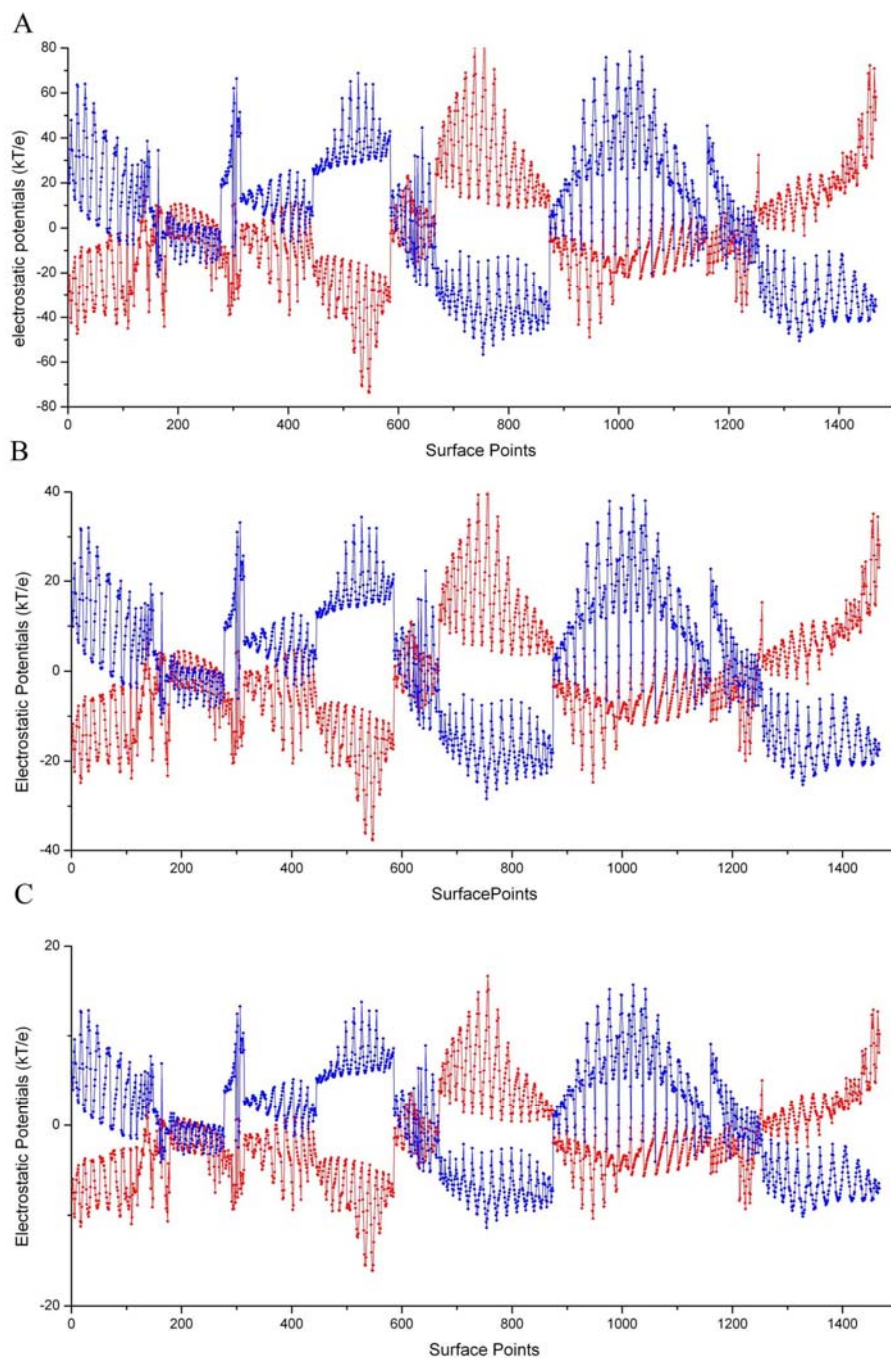

**Figure S2. Variation in the internal dielectric of the continuum does not alter electrostatic complementarity for interior residues.** Electrostatic potentials computed at the commonly used ranges of internal dielectrics:  $\epsilon_p = 2$  (A), 4 (B), 10 (C) for a completely buried asparagine (58-Asn: 2HAQ) (**blue**: due to the atoms of the selected residue, **red**: due to the rest of the charged protein atoms). As expected, change in  $\epsilon_p$  changes merely the scale of the potentials thereby leading to conserved  $E_m$  values.

**Table S1. Effect of large dielectric on  $E_m$ .** Root mean square deviations of different  $E_m$  measures ( $E_m^{all}$ ,  $E_m^{sc}$ ,  $E_m^{mc}$ ) calculated at (large) internal dielectric ( $\epsilon_p$ ) of 20, 40 respectively (tabulated in each entry separated by a comma) with respect to those calculated at the preferred value of  $\epsilon_p = 2$  for residues distributed in different burial bins: (bin1:  $0.00 \leq \text{Bur} \leq 0.05$ ; bin2:  $0.05 < \text{Bur} \leq 0.15$ ; bin3:  $0.15 < \text{Bur} \leq 0.30$ ).

| Residue | bin1            |                 |                 | bin2            |                 |                 | bin3            |                 |                 |
|---------|-----------------|-----------------|-----------------|-----------------|-----------------|-----------------|-----------------|-----------------|-----------------|
|         | $E_m^{all}$     | $E_m^{sc}$      | $E_m^{mc}$      | $E_m^{all}$     | $E_m^{sc}$      | $E_m^{mc}$      | $E_m^{all}$     | $E_m^{sc}$      | $E_m^{mc}$      |
| ALA     | 0.009,<br>0.017 | 0.010,<br>0.020 | 0.009,<br>0.017 | 0.017,<br>0.034 | 0.020,<br>0.042 | 0.017,<br>0.033 | 0.016,<br>0.038 | 0.015,<br>0.036 | 0.022,<br>0.050 |
| VAL     | 0.008,<br>0.016 | 0.007,<br>0.016 | 0.008,<br>0.015 | 0.011,<br>0.025 | 0.011,<br>0.025 | 0.012,<br>0.024 | 0.014,<br>0.033 | 0.015,<br>0.032 | 0.015,<br>0.033 |
| LEU     | 0.008,<br>0.019 | 0.009,<br>0.019 | 0.008,<br>0.015 | 0.012,<br>0.030 | 0.013,<br>0.029 | 0.011,<br>0.026 | 0.014,<br>0.036 | 0.012,<br>0.031 | 0.014,<br>0.034 |
| ILE     | 0.008,<br>0.017 | 0.007,<br>0.016 | 0.007,<br>0.014 | 0.013,<br>0.031 | 0.012,<br>0.028 | 0.011,<br>0.027 | 0.014,<br>0.033 | 0.014,<br>0.031 | 0.014,<br>0.031 |
| PHE     | 0.007,<br>0.014 | 0.005,<br>0.011 | 0.009,<br>0.016 | 0.011,<br>0.025 | 0.010,<br>0.021 | 0.015,<br>0.031 | 0.012,<br>0.029 | 0.012,<br>0.029 | 0.011,<br>0.025 |
| TYR     | 0.006,<br>0.012 | 0.007,<br>0.014 | 0.007,<br>0.013 | 0.012,<br>0.026 | 0.013,<br>0.027 | 0.012,<br>0.023 | 0.014,<br>0.035 | 0.013,<br>0.027 | 0.018,<br>0.04  |
| TRP     | 0.007,<br>0.014 | 0.007,<br>0.015 | 0.007,<br>0.014 | 0.009,<br>0.024 | 0.011,<br>0.025 | 0.010,<br>0.023 | 0.016,<br>0.038 | 0.018,<br>0.039 | 0.017,<br>0.038 |
| CYS     | 0.004,<br>0.009 | 0.006,<br>0.013 | 0.007,<br>0.014 | 0.008,<br>0.018 | 0.010,<br>0.020 | 0.014,<br>0.031 | 0.008,<br>0.016 | 0.016,<br>0.032 | 0.012,<br>0.026 |
| MET     | 0.004,<br>0.008 | 0.005,<br>0.011 | 0.007,<br>0.014 | 0.006,<br>0.013 | 0.007,<br>0.014 | 0.014,<br>0.029 | 0.007,<br>0.015 | 0.015,<br>0.032 | 0.009,<br>0.020 |
| SER     | 0.007,<br>0.013 | 0.007,<br>0.014 | 0.007,<br>0.015 | 0.012,<br>0.028 | 0.015,<br>0.032 | 0.013,<br>0.028 | 0.014,<br>0.033 | 0.014,<br>0.032 | 0.018,<br>0.041 |
| THR     | 0.006,<br>0.012 | 0.007,<br>0.014 | 0.008,<br>0.015 | 0.013,<br>0.026 | 0.016,<br>0.032 | 0.013,<br>0.025 | 0.013,<br>0.031 | 0.010,<br>0.024 | 0.018,<br>0.042 |
| ASN     | 0.009,<br>0.013 | 0.010,<br>0.016 | 0.009,<br>0.014 | 0.011,<br>0.024 | 0.014,<br>0.030 | 0.013,<br>0.027 | 0.011,<br>0.027 | 0.009,<br>0.022 | 0.015,<br>0.034 |
| GLN     | 0.012,<br>0.018 | 0.015,<br>0.025 | 0.017,<br>0.025 | 0.011,<br>0.021 | 0.011,<br>0.023 | 0.016,<br>0.029 | 0.010,<br>0.025 | 0.009,<br>0.022 | 0.016,<br>0.035 |
| ASP     | 0.011,<br>0.02  | 0.011,<br>0.021 | 0.008,<br>0.015 | 0.012,<br>0.028 | 0.015,<br>0.035 | 0.009,<br>0.020 | 0.017,<br>0.036 | 0.012,<br>0.024 | 0.023,<br>0.049 |
| GLU     | 0.013,<br>0.023 | 0.012,<br>0.021 | 0.009,<br>0.017 | 0.013,<br>0.029 | 0.014,<br>0.029 | 0.017,<br>0.033 | 0.013,<br>0.030 | 0.015,<br>0.036 | 0.015,<br>0.030 |
| LYS     | 0.029,<br>0.035 | 0.030,<br>0.040 | 0.029,<br>0.033 | 0.012,<br>0.029 | 0.026,<br>0.055 | 0.004,<br>0.009 | 0.021,<br>0.050 | 0.006,<br>0.015 | 0.047,<br>0.096 |
| ARG     | 0.013,<br>0.026 | 0.018,<br>0.039 | 0.005,<br>0.009 | 0.018,<br>0.042 | 0.027,<br>0.070 | 0.009,<br>0.017 | 0.022,<br>0.057 | 0.010,<br>0.021 | 0.033,<br>0.094 |
| PRO     | 0.013,<br>0.022 | 0.010,<br>0.019 | 0.015,<br>0.022 | 0.013,<br>0.028 | 0.016,<br>0.035 | 0.014,<br>0.027 | 0.017,<br>0.041 | 0.014,<br>0.031 | 0.017,<br>0.039 |
| HIS     | 0.007,<br>0.014 | 0.010,<br>0.019 | 0.007,<br>0.014 | 0.010,<br>0.022 | 0.012,<br>0.026 | 0.010,<br>0.023 | 0.012,<br>0.03  | 0.012,<br>0.026 | 0.017,<br>0.038 |

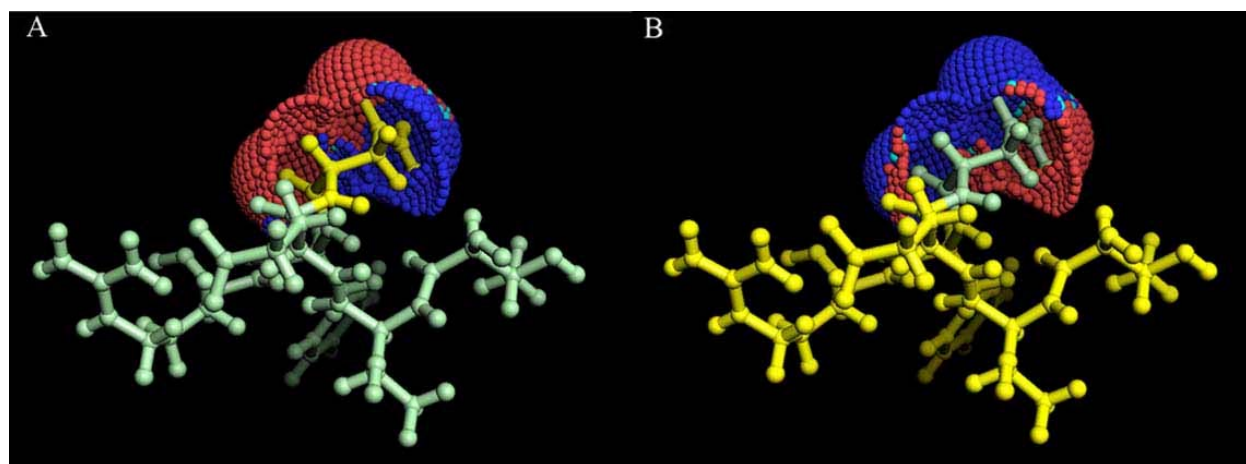

**Figure S3. Molecular surface of an individual buried residue (target) exhibiting anti-correlated (complementary) electrostatic potentials.** The figure shows the van der Waals surface (displayed as non-bonded spheres) of a completely buried asparagine (58-Asn from 2HAQ) along with its own atoms accompanied by a few more residues along the polypeptide chain as representative of the ‘rest of the protein atoms’ (sticks). Atoms (along with their interconnecting bonds) are colored by ‘bright yellow’ when ‘charged’ and by ‘pale green’ when ‘uncharged’. Surface coloring follows standard conventions where patches of positive potentials are colored by ‘blue’, negative potentials by ‘red’ and neutral ( $0.0 \pm 0.5$  kT/e) by ‘cyan’. (A) shows potentials realized due to the charged atoms of the residue itself whereas (B) shows potentials due to the rest of the charged protein atoms. Figure constructed by **PyMol** [<http://www.pymol.org/>].

**Table S2. Assessment of the relative contributions of main chain and side chain atoms on electrostatic complementarity.** Average  $E_m$  ( $\overline{E_m}$ ) and their standard deviations (in parentheses) for different residues ( $0.00 \leq \text{Bur} \leq 0.05$ , see **Main Text**) calculated from different combinations of atomic sets and surfaces: **S1**: main chain atoms (target) versus main chain atoms ('rest of the protein') on main chain surface (of the target residue); **S2**: main chain atoms (target) versus main chain atoms (rest) on side chain surface (target). **S3**: side chain atoms (target) versus side chain atoms (rest) on side chain surface (target); **S4**: side chain atoms (target) versus all atoms (rest) on side chain surface (target).

| Residue | $\overline{E_m}$ |             |              |              |
|---------|------------------|-------------|--------------|--------------|
|         | S1               | S2          | S3           | S4           |
| ALA     | 0.63 (0.25)      | 0.43 (0.22) | -0.04 (0.24) | -0.08 (0.18) |
| VAL     | 0.65 (0.22)      | 0.44 (0.23) | -0.02 (0.25) | 0.15 (0.19)  |
| LEU     | 0.65 (0.22)      | 0.42 (0.24) | 0.01 (0.26)  | 0.14 (0.21)  |
| ILE     | 0.65 (0.23)      | 0.43 (0.22) | -0.01 (0.28) | 0.14 (0.24)  |
| PHE     | 0.63 (0.24)      | 0.36 (0.28) | 0.13 (0.16)  | 0.22 (0.17)  |
| TYR     | 0.61 (0.25)      | 0.33 (0.27) | 0.25 (0.27)  | 0.43 (0.22)  |
| TRP     | 0.59 (0.28)      | 0.28 (0.26) | 0.30 (0.22)  | 0.42 (0.19)  |
| SER     | 0.53 (0.28)      | 0.25 (0.34) | 0.24 (0.37)  | 0.53 (0.28)  |
| THR     | 0.55 (0.28)      | 0.30 (0.29) | 0.16 (0.34)  | 0.45 (0.28)  |
| CYS     | 0.58 (0.27)      | 0.36 (0.23) | 0.06 (0.29)  | 0.18 (0.25)  |
| MET     | 0.64 (0.23)      | 0.38 (0.22) | 0.12 (0.22)  | 0.21 (0.17)  |
| ASP     | 0.47 (0.30)      | 0.17 (0.28) | 0.27 (0.41)  | 0.55 (0.33)  |
| GLU     | 0.56 (0.28)      | 0.27 (0.28) | 0.31 (0.42)  | 0.54 (0.37)  |
| ASN     | 0.54 (0.27)      | 0.23 (0.30) | 0.33 (0.38)  | 0.64 (0.23)  |
| GLN     | 0.57 (0.29)      | 0.29 (0.28) | 0.32 (0.37)  | 0.60 (0.24)  |
| LYS     | 0.62 (0.24)      | 0.29 (0.23) | 0.40 (0.37)  | 0.58 (0.24)  |
| ARG     | 0.59 (0.25)      | 0.23 (0.22) | 0.28 (0.30)  | 0.53 (0.21)  |
| PRO     | 0.49 (0.26)      | 0.25 (0.28) | -0.15 (0.35) | -0.05 (0.28) |
| HIS     | 0.55 (0.29)      | 0.30 (0.28) | 0.28 (0.36)  | 0.49 (0.31)  |



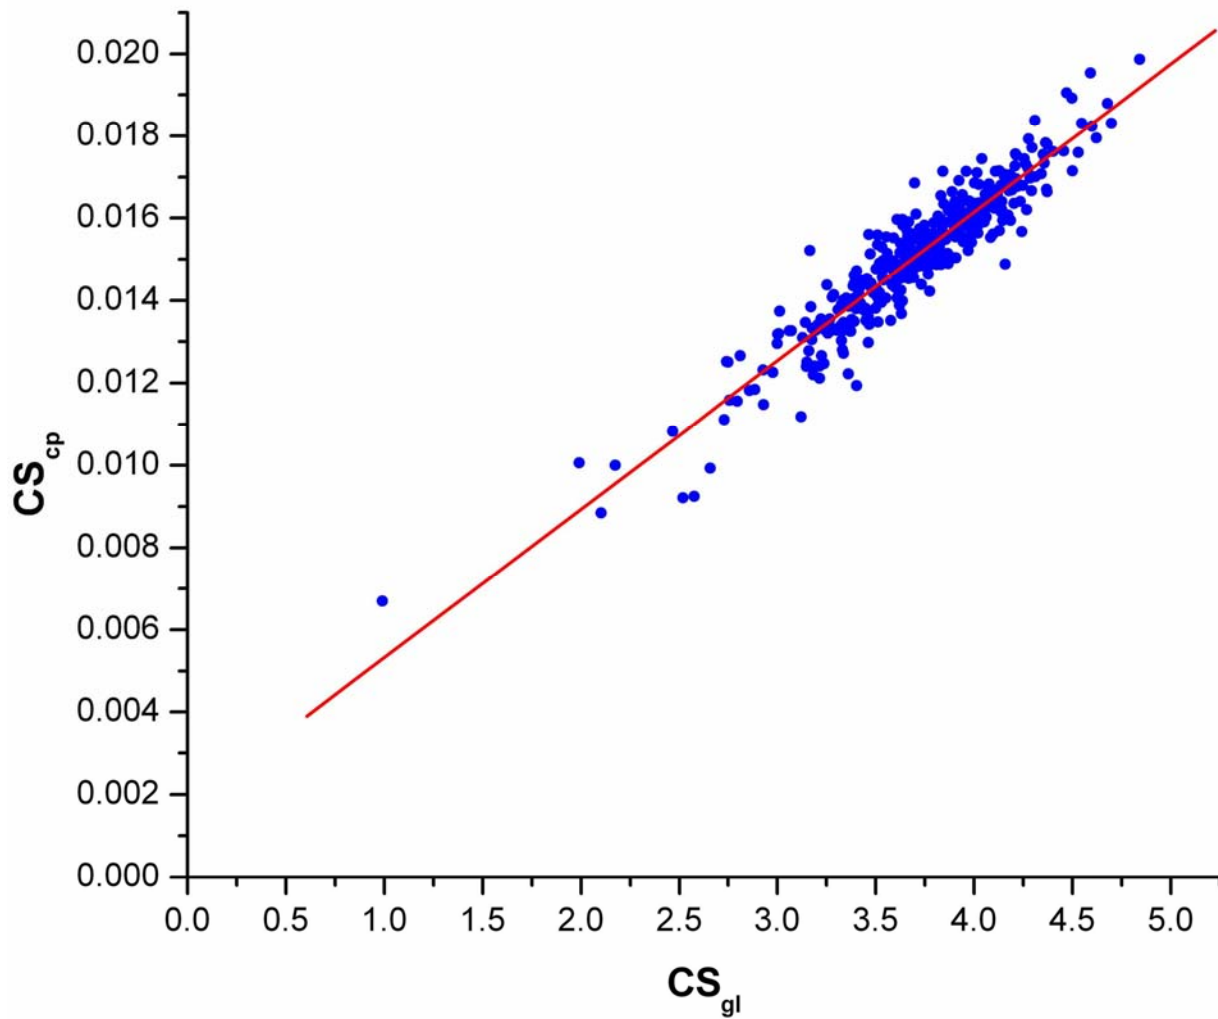

**Figure S4. The two Complementarity Scores are linearly correlated.** The figure shows the plot of  $CS_{gl}$  versus  $CS_{cp}$  computed for the 400 native folds (in **DB2**) linearly fitting to each-other ( $R^2 = 0.94$ ).

**Table S3. Performance of  $CS_{gl}$  and  $CS_{cp}$  in single decoy sets.** Scores obtained by native and decoy structures have been tabulated for both functions in the decoy sets **(A)** Misfold **(2)** and **(B)** Pdberr **(3)** and sgpa **(4)**. For **(A)** Misfold, sequence of a native structure (e.g., 1BP2: 1<sup>st</sup> row) have been threaded onto the template from an unrelated fold (2PAZ) to generate the corresponding decoy (1BP2on2PAZ). In **(B)** MDC1 and MDC2 refer to the two molecular dynamic simulation snapshots of 2SGA. The decoy sets have been downloaded from the database ‘Decoys ‘R’ Us’: [<http://dd.compbio.washington.edu/>].

**(A).**

| Native | Decoy       | Resolution / R-factor | $CS_{gl}$ |       | $CS_{cp}$ |        |
|--------|-------------|-----------------------|-----------|-------|-----------|--------|
|        |             |                       | Native    | decoy | native    | decoy  |
| 1BP2   | 1BP2on2PAZ  | 1.7/0.17              | 2.64      | 0.88  | 0.0113    | 0.0039 |
| 1FDX   | 1FDXon 5RXN | 2.0/0.19              | 1.91      | 1.58  | 0.0071    | 0.0065 |
| 1HIP   | 1HIPon 2B5C | 2.0/0.24              | 2.12      | 0.58  | 0.0097    | 0.0024 |
| 1LH1   | 1LH1on 2I1B | 2.0/0.00              | 2.55      | 1.05  | 0.0111    | 0.0044 |
| 1P2P   | 1P2Pon1RN3  | 2.6/0.24              | 2.08      | 1.35  | 0.0085    | 0.0047 |
| 1PPT   | 1PPTon1CBH  | 1.4/0.00              | 2.37      | 0.94  | 0.0103    | 0.0033 |
| 1REI   | 1REIon5PAD  | 2.0/0.24              | 2.63      | 0.84  | 0.0108    | 0.0038 |
| 1RHD   | 1RHDon2CYP  | 2.5/0.00              | 1.58      | 0.84  | 0.0066    | 0.0035 |
| 1RN3   | 1RN3on1P2P  | 1.5/0.22              | 2.86      | 1.15  | 0.0120    | 0.0047 |
| 1SN3   | 1SN3on2CI2  | 1.2/0.19              | 2.13      | 0.60  | 0.0085    | 0.0032 |
| 1SN3   | 1SN3on2CRO  | 1.2/0.19              | 2.13      | 0.91  | 0.0085    | 0.0034 |
| 2B5C   | 2B5Con1HIP  | 2.0/0.16              | 3.48      | 0.97  | 0.0149    | 0.0034 |
| 2CDV   | 2CDVon2SSI  | 1.8/0.18              | 1.13      | 0.95  | 0.0047    | 0.0033 |
| 2CI2   | 2CI2on1SN3  | 2.0/0.20              | 4.09      | 1.05  | 0.0174    | 0.0045 |
| 2CI2   | 2CI2on2CRO  | 2.0/0.20              | 4.09      | 0.81  | 0.0174    | 0.0032 |
| 2CRO   | 2CROon1SN3  | 2.4/0.20              | 3.49      | 0.82  | 0.0130    | 0.0032 |
| 2CRO   | 2CROon2CI2  | 2.4/0.20              | 3.49      | 0.92  | 0.0130    | 0.0038 |
| 2CYP   | 2CYPon1RHD  | 1.7/0.22              | 2.84      | 0.84  | 0.0115    | 0.0033 |
| 2I1B   | 2I1Bon1LH1  | 2.0/0.17              | 2.90      | 0.96  | 0.0119    | 0.0034 |
| 2PAZ   | 2PAZon1BP2  | 1.6/0.18              | 3.21      | 1.42  | 0.0137    | 0.0053 |
| 2SSI   | 2SSIon2CDV  | 2.3/0.19              | 1.04      | 0.86  | 0.0046    | 0.0036 |
| 2TMN   | 2TMNon2TS1  | 1.6/0.18              | 2.71      | 0.96  | 0.0107    | 0.0037 |
| 2TS1   | 2TS1on2TMN  | 2.3/0.23              | 2.74      | 1.02  | 0.0114    | 0.0039 |
| 5PAD   | 5PADon1REI  | 2.8/0.00              | 2.26      | 1.06  | 0.0093    | 0.0042 |
| 5RXN   | 5RXNon1FDX  | 1.2/0.14              | 2.34      | 1.31  | 0.0117    | 0.0048 |

**(B).**

| Native | Decoy | Chain length | CS <sub>gl</sub> |       | CS <sub>cp</sub> |       |
|--------|-------|--------------|------------------|-------|------------------|-------|
|        |       |              | Native           | decoy | native           | decoy |
| 2F19   | 1F19  | 435          | 2.172            | 0.617 | 0.009            | 0.003 |
| 3HFL   | 2HFL  | 556          | 2.329            | 1.805 | 0.009            | 0.007 |
| 5FD1   | 2FD1  | 106          | 2.951            | 0.464 | 0.011            | 0.002 |
| 2SGA   | MDC1  | 181          | 2.546            | 1.952 | 0.011            | 0.008 |
| 2SGA   | MDC2  | 181          | 2.546            | 1.754 | 0.011            | 0.007 |

**Table S4. Comparison in the performances of different knowledge-based scoring functions on single decoy sets.** The functions include  $R_s$ ,  $R_p$  (5), RAPD, CDF (6), Surfield (7), atomic knowledge based potential (AKBP) (8), Residue Contact Potential (RCP) (9) along with the complementarity scores ( $CS_{gl}$ ,  $CS_{cp}$ ) developed in this study. The number of successful hits / total number of trials are tabulated.

| Scoring Functions | Misfold | Pdberr and sgpa |
|-------------------|---------|-----------------|
| $R_s$             | 24/24   | 5/5             |
| $R_p$             | 20/24   | 5/5             |
| RAPD              | 24/24   | 5/5             |
| CDF               | 19/24   | 5/5             |
| Surfield          | 23/23   | -               |
| AKBP              | 24/24   | 5/5             |
| RCP               | 24/24   | 4/5             |
| $CS_{gl}$         | 25/25   | 5/5             |
| $CS_{cp}$         | 25/25   | 5/5             |

**Table S5. Performance of  $CS_{gl}$  and  $CS_{cp}$  in multiple decoy sets of small proteins.** Results tabulated for the decoy sets **(A)** 4-state reduced **(10)**, **(B)** Fisa **(11)**. **Resol / R** stands for resolution / R-factor of the native crystal structures whereas  $N_{dec}$  refers to the number of decoys. For **(B)** Fisa, there are 500 decoys for each native structure respectively. All proteins in Fisa belong to the all  $\alpha$  class.  $Z_{CS}$  denotes the native Z-scores for the corresponding functions ( $CS_{gl}/CS_{cp}$ ). The decoy sets have been downloaded from the database ‘Decoys ‘R’ Us’: [<http://dd.compbio.washington.edu/>].

**(A).**

| PDB ID | Length (aa) | class          | Resol (Å) / R | $N_{dec}$ | RMSD (Å) range of decoys | $CS_{gl}$ |          | $CS_{cp}$ |          |
|--------|-------------|----------------|---------------|-----------|--------------------------|-----------|----------|-----------|----------|
|        |             |                |               |           |                          | Rank      | $Z_{CS}$ | Rank      | $Z_{CS}$ |
| 1CTF   | 68          | $\alpha+\beta$ | 1.70/0.17     | 630       | 1.3 - 9.1                | 1         | 7.9      | 1         | 7.1      |
| 1R69   | 63          | All $\alpha$   | 2.0/0.19      | 675       | 0.9 - 8.3                | 1         | 6.4      | 1         | 6.1      |
| 1SN3   | 65          | $\alpha+\beta$ | 1.2/0.19      | 660       | 1.3 - 9.1                | 1         | 5.6      | 1         | 4.7      |
| 2CRO   | 65          | All $\alpha$   | 2.4/0.20      | 674       | 0.8 - 8.3                | 1         | 5.9      | 1         | 5.0      |
| 3ICB   | 75          | All $\alpha$   | 2.3/0.18      | 653       | 0.9 - 9.4                | 1         | 6.7      | 1         | 4.9      |
| 4PTI   | 58          | $\alpha+\beta$ | 1.5/0.16      | 687       | 1.4 - 9.3                | 1         | 3.6      | 1         | 3.9      |
| 4RXN   | 54          | All $\beta$    | 1.2/0.13      | 677       | 1.4 - 8.1                | 10        | 2.7      | 15        | 2.3      |

**(B).**

| PDB ID | Length (aa) | Resol (Å) / R | RMSD (Å) range of decoys | $CS_{gl}$ |          | $CS_{cp}$ |          |
|--------|-------------|---------------|--------------------------|-----------|----------|-----------|----------|
|        |             |               |                          | Rank      | $Z_{CS}$ | Rank      | $Z_{CS}$ |
| 1FC2   | 43          | 2.8/0.22      | 3.1 - 10.5               | 206       | 0.2      | 293       | -0.2     |
| 1HDD-C | 57          | 2.8/0.24      | 2.8 - 12.9               | 4         | 3.5      | 5         | 3.0      |
| 2CRO   | 65          | 2.4/0.20      | 4.3 - 12.6               | 1         | 7.2      | 1         | 6.3      |
| 4ICB   | 76          | 1.6/0.19      | 4.8 - 14.1               | 1         | 5.8      | 1         | 5.1      |

**Table S6. Comparison in the performances of different knowledge based scoring functions on multiple decoy sets.** The functions include DFIRE (12), Rosetta (13), ModPipe-Pair (MPP), ModPipe-Surf (MPS) (14), TE13, LHL (15), Force Model (FM) (16), DOPE (17), MJ (18), Surficial (7),  $R_s$ ,  $R_p$  (5) along with the complementarity scores ( $CS_{gl}$ ,  $CS_{cp}$ ). All entries in the table refer to the rank of the native structure as detected by the corresponding method.

| Decoy Set      | PDB ID | DFIRE | Rosetta | MPP | MPS | TE13 | LHL | FM | DOPE | MJ | Surfield | $R_s$ | $R_p$ | $CS_{gl}$ | $CS_{cp}$ |
|----------------|--------|-------|---------|-----|-----|------|-----|----|------|----|----------|-------|-------|-----------|-----------|
| 4state reduced | 1CTF   | 1     | 1       | 1   | 1   | 1    | 1   | 1  | 1    | 1  | 1        | 1     | 1     | 1         | 1         |
|                | 1R69   | 1     | 2       | 1   | 17  | 1    | 1   | 8  | 1    | 1  | 1        | 1     | 19    | 1         | 1         |
|                | 1SN3   | 1     | 1       | 1   | 7   | 6    | 1   | 23 | 1    | 2  | 1        | 5     | 23    | 1         | 1         |
|                | 2CRO   | 1     | 5       | 1   | 103 | 1    | 1   | 4  | 1    | 1  | 1        | 1     | 1     | 1         | 1         |
|                | 3ICB   | 4     | 6       | 15  | 33  | -    | 5   | 2  | 1    | -  | 1        | 1     | 6     | 1         | 1         |
|                | 4PTI   | 1     | 1       | 1   | 71  | 7    | 1   | 13 | 1    | 3  | 1        | 1     | 1     | 1         | 1         |
|                | 4RXN   | 1     | 1       | 1   | 18  | 16   | 51  | 85 | 1    | 1  | 1        | 1     | 1     | 10        | 15        |
| Fisa           | 1FC2   | 254   | 158     | 491 | 1   | -    | -   | 1  | 357  | -  | 1        | -     | -     | 206       | 293       |
|                | 1HDD   | 1     | 90      | 293 | 18  | -    | -   | 1  | 1    | -  | 1        | -     | -     | 4         | 5         |
|                | 2CRO   | 1     | 26      | 11  | 146 | -    | -   | 1  | 1    | -  | 1        | -     | -     | 1         | 1         |
|                | 4ICB   | 1     | 1       | 196 | 2   | -    | -   | 1  | 1    | -  | 1        | -     | -     | 1         | 1         |

**Table S7. Performance of  $CS_{gl}$  and  $CS_{cp}$  in decoy sets composed by homology modeling.** Results tabulated for the decoy sets (A) Hg\_structal (19), (B) Ig\_structal (19) and (C) Ig\_structal\_hires (19). **Resol / R** stands for resolution / R-factor of the native crystal structure whereas  $N_{dec}$  refers to the number of decoys. For (A) Hg\_structal, (B) Ig\_structal and (C) Ig\_structal\_hires there are 29, 61 and 19 decoys for each native structure respectively. (A) Hg\_structal is constituted of globins whereas (B) Ig\_structal and (C) Ig\_structal\_hires contains immunoglobulins.  $Z_{CS}$  denotes the native Z-scores for the corresponding function ( $CS_{gl}/CS_{cp}$ ). The decoy sets have been downloaded from the database ‘Decoys ‘R’ Us’: [<http://dd.compbio.washington.edu/>].

(A).

| PDB ID | Length (aa) | Resol (Å) / R | RMSD (Å) range of decoys | $CS_{gl}$ |          | $CS_{cp}$ |          |
|--------|-------------|---------------|--------------------------|-----------|----------|-----------|----------|
|        |             |               |                          | Rank      | $Z_{CS}$ | Rank      | $Z_{CS}$ |
| 1ASH   | 147         | 2.2/0.18      | 2.222 - 6.947            | 1         | 4.1      | 1         | 3.6      |
| 1BAB-B | 146         | 1.5/0.16      | 0.702 - 6.920            | 1         | 3.4      | 1         | 3.1      |
| 1COL-A | 197         | 2.4/0.18      | 12.399 - 30.284          | 1         | 4.8      | 1         | 4.6      |
| 1CPC-A | 162         | 1.7/0.18      | 6.835 - 13.957           | 1         | 4.6      | 1         | 4.5      |
| 1ECD   | 136         | 1.4/0.00      | 1.471 - 6.188            | 1         | 3.8      | 1         | 4.1      |
| 1EMY   | 153         | 1.8/0.15      | 0.735 - 9.281            | 1         | 2.9      | 1         | 2.8      |
| 1FLP   | 142         | 1.5/0.17      | 1.734 - 7.227            | 1         | 4.1      | 1         | 4.1      |
| 1GDM   | 153         | 1.7/0.16      | 2.609 - 8.371            | 1         | 3.2      | 1         | 3.3      |
| 1HBG   | 147         | 1.5/0.15      | 2.050 - 6.896            | 1         | 3.8      | 1         | 4.1      |
| 1HBH-A | 142         | 2.2/0.16      | 0.958 - 6.347            | 1         | 1.9      | 1         | 2.3      |
| 1HBH-B | 146         | 2.2/0.16      | 1.024 - 7.330            | 1         | 2.3      | 1         | 2.4      |
| 1HDA-A | 141         | 2.2/0.19      | 0.487 - 5.794            | 1         | 2.6      | 1         | 2.7      |
| 1HDA-B | 145         | 2.2/0.19      | 0.545 - 5.644            | 1         | 2.9      | 1         | 2.9      |
| 1HLB   | 157         | 2.5/0.15      | 2.891 - 7.001            | 1         | 1.6      | 1         | 2.4      |
| 1HLM   | 158         | 2.9/0.19      | 2.973 - 8.737            | 20        | -0.5     | 17        | -0.3     |
| 1HSY   | 153         | 1.9/0.16      | 0.795 - 9.681            | 1         | 2.6      | 1         | 2.2      |
| 1ITH-A | 141         | 2.5/0.15      | 1.638 - 6.071            | 1         | 4.5      | 1         | 4.5      |
| 1LHT   | 153         | 2.0/0.18      | 0.814 - 9.736            | 1         | 2.5      | 1         | 2.4      |
| 1MBA   | 146         | 1.6/0.19      | 1.829 - 7.314            | 1         | 3.9      | 1         | 3.8      |
| 1MBS   | 153         | 2.5/0.00      | 1.698 - 9.304            | 29        | -1.2     | 30        | -1.3     |
| 1MYG-A | 153         | 1.8/0.20      | 0.479 - 9.562            | 1         | 2.6      | 1         | 2.5      |
| 1MYJ-A | 153         | 1.9/0.21      | 0.623 - 7.944            | 1         | 2.9      | 1         | 3.0      |
| 1MYT   | 146         | 1.7/0.18      | 1.014 - 10.043           | 1         | 3.0      | 1         | 3.0      |
| 2DHB-A | 141         | 2.8/0.00      | 0.648 - 6.358            | 14        | -0.1     | 13        | 0.2      |
| 2DHB-B | 146         | 2.8/0.00      | 0.858 - 7.062            | 13        | 0.2      | 12        | 0.3      |
| 2LHB   | 149         | 2.0/0.14      | 3.022 - 8.080            | 1         | 2.9      | 1         | 3.0      |
| 2PGH-A | 141         | 2.8/0.15      | 0.707 - 6.485            | 16        | -0.1     | 14        | -0.1     |
| 2PGH-B | 146         | 2.8/0.15      | 0.769 - 7.479            | 11        | 0.4      | 14        | 0.2      |
| 4SDH-A | 145         | 1.6/0.16      | 2.273 - 6.429            | 1         | 3.4      | 1         | 3.3      |

(B).

| PDB ID | Length (aa) | Resol (Å) / R | RMSD (Å) range of decoys | $CS_{gl}$ |          | $CS_{cp}$ |          |
|--------|-------------|---------------|--------------------------|-----------|----------|-----------|----------|
|        |             |               |                          | Rank      | $Z_{CS}$ | Rank      | $Z_{CS}$ |
| 1ACY   | 232         | 3.0/0.21      | 1.167 - 4.455            | 1         | 5.7      | 1         | 5.7      |
| 1BAF   | 222         | 2.9/0.20      | 1.123 - 3.973            | 1         | 3.8      | 1         | 4.0      |
| 1BBB   | 231         | 2.8/0.19      | 1.610 - 4.537            | 1         | 3.5      | 1         | 4.2      |
| 1BBJ   | 221         | 3.1/0.18      | 0.797 - 4.047            | 1         | 2.3      | 1         | 2.3      |
| 1DBB   | 231         | 2.7/0.21      | 0.993 - 4.203            | 3         | 1.9      | 1         | 2.2      |
| 1DFB   | 231         | 2.7/0.18      | 1.383 - 4.826            | 2         | 1.8      | 3         | 1.8      |
| 1DVF   | 223         | 1.9/0.19      | 0.706 - 4.176            | 1         | 5.2      | 1         | 5.2      |
| 1EAP   | 225         | 2.5/0.19      | 1.557 - 4.537            | 1         | 4.9      | 1         | 4.7      |
| 1FAI   | 231         | 2.7/0.19      | 1.258 - 4.619            | 1         | 3.3      | 1         | 3.6      |
| 1FBI   | 229         | 3.0/0.19      | 1.322 - 4.993            | 2         | 2.5      | 1         | 1.9      |
| 1FGV   | 227         | 1.9/0.18      | 0.977 - 4.502            | 1         | 3.7      | 1         | 3.7      |
| 1FIG   | 227         | 3.0/0.22      | 1.423 - 4.388            | 19        | 0.5      | 12        | 0.8      |
| 1FLR   | 228         | 1.9/0.19      | 1.090 - 4.284            | 1         | 3.7      | 1         | 3.8      |
| 1FOR   | 225         | 2.8/0.17      | 0.998 - 4.200            | 1         | 2.6      | 1         | 2.9      |
| 1FPT   | 231         | 3.0/0.23      | 0.891 - 4.332            | 7         | 1.4      | 9         | 0.9      |
| 1FRG   | 233         | 2.8/0.19      | 0.952 - 4.134            | 1         | 5.5      | 1         | 5.7      |
| 1FVC   | 229         | 2.2/0.18      | 1.505 - 4.970            | 1         | 3.8      | 1         | 4.1      |
| 1FVD   | 227         | 2.5/0.17      | 0.798 - 4.137            | 1         | 3.3      | 1         | 3.7      |
| 1GAF   | 221         | 2.0/0.24      | 0.841 - 4.034            | 1         | 3.6      | 1         | 2.9      |
| 1GGI   | 226         | 2.8/0.18      | 0.978 - 4.247            | 1         | 3.2      | 1         | 3.5      |
| 1GIG   | 231         | 2.3/0.19      | 1.424 - 4.497            | 1         | 5.6      | 1         | 5.7      |
| 1HIL   | 233         | 2.0/0.19      | 0.910 - 4.303            | 1         | 5.2      | 1         | 5.2      |
| 1HKL   | 221         | 2.7/0.18      | 0.762 - 3.996            | 6         | 1.5      | 9         | 1.2      |
| 1IAI   | 228         | 2.9/0.21      | 1.069 - 4.594            | 5         | 1.7      | 5         | 1.5      |
| 1IBG   | 232         | 2.7/0.20      | 1.483 - 4.713            | 1         | 3.7      | 1         | 3.7      |
| 1IGC   | 227         | 2.6/0.16      | 0.960 - 4.237            | 12        | 0.9      | 14        | 0.8      |
| 1IGF   | 231         | 2.8/0.18      | 0.927 - 4.241            | 1         | 3.5      | 1         | 3.7      |
| 1IGI   | 231         | 2.7/0.17      | 1.579 - 4.266            | 1         | 3.7      | 1         | 4.0      |
| 1IGM   | 227         | 2.3/0.20      | 1.077 - 4.146            | 1         | 2.0      | 1         | 2.5      |
| 1IKF   | 233         | 2.5/0.16      | 1.330 - 5.105            | 1         | 4.6      | 1         | 4.8      |
| 1IND   | 222         | 2.2/0.18      | 1.183 - 4.213            | 1         | 3.7      | 1         | 3.5      |
| 1JEL   | 230         | 2.8/0.19      | 1.032 - 4.193            | 1         | 3.9      | 1         | 3.8      |
| 1JHL   | 224         | 2.4/0.21      | 1.100 - 4.083            | 1         | 3.7      | 1         | 3.7      |
| 1KEM   | 231         | 2.2/0.18      | 1.386 - 4.671            | 1         | 2.2      | 1         | 2.2      |
| 1MAM   | 227         | 2.5/0.21      | 1.473 - 4.170            | 1         | 3.3      | 1         | 3.8      |
| 1MCP   | 235         | 2.7/0.22      | 1.186 - 4.520            | 1         | 4.5      | 1         | 4.4      |
| 1MFA   | 229         | 1.7/0.16      | 2.053 - 4.805            | 1         | 4.6      | 1         | 4.7      |
| 1MLB   | 223         | 2.1/0.18      | 0.899 - 4.186            | 1         | 3.4      | 1         | 3.9      |

|      |     |          |               |    |     |    |     |
|------|-----|----------|---------------|----|-----|----|-----|
| 1MRD | 225 | 2.4/0.19 | 1.311 - 4.150 | 1  | 3.8 | 1  | 3.5 |
| 1NBV | 232 | 2.0/0.24 | 1.205 - 4.237 | 1  | 2.6 | 1  | 2.4 |
| 1NCB | 227 | 2.5/0.16 | 1.167 - 4.385 | 1  | 3.1 | 1  | 3.1 |
| 1NGQ | 229 | 2.4/0.19 | 1.407 - 4.065 | 1  | 3.8 | 1  | 3.9 |
| 1NMB | 231 | 2.5/0.21 | 1.496 - 5.568 | 1  | 3.6 | 1  | 3.5 |
| 1NSN | 224 | 2.9/0.19 | 1.163 - 4.033 | 15 | 0.8 | 19 | 0.5 |
| 1OPG | 232 | 2.0/0.16 | 1.379 - 4.795 | 8  | 1.1 | 8  | 1.1 |
| 1PLG | 228 | 2.8/0.16 | 1.036 - 4.168 | 1  | 4.3 | 1  | 3.9 |
| 1RMF | 231 | 2.8/0.18 | 1.563 - 4.457 | 7  | 1.3 | 8  | 0.8 |
| 1TET | 228 | 2.3/0.14 | 0.768 - 4.119 | 1  | 4.0 | 1  | 4.3 |
| 1UCB | 228 | 2.5/0.20 | 1.183 - 4.346 | 1  | 2.9 | 1  | 3.2 |
| 1VFA | 224 | 1.8/0.15 | 1.135 - 4.080 | 1  | 4.7 | 1  | 4.6 |
| 1VGE | 231 | 2.0/0.18 | 1.619 - 5.004 | 1  | 5.4 | 1  | 5.2 |
| 1YUH | 225 | 3.0/0.19 | 1.265 - 4.292 | 11 | 1.1 | 30 | 0.3 |
| 2CGR | 228 | 2.2/0.21 | 0.925 - 4.226 | 1  | 3.7 | 1  | 4.3 |
| 2FB4 | 236 | 1.9/0.18 | 1.667 - 6.135 | 1  | 4.7 | 1  | 4.9 |
| 2FBJ | 224 | 2.0/0.19 | 1.078 - 4.204 | 1  | 4.3 | 1  | 4.1 |
| 2GFB | 227 | 3.0/0.21 | 1.639 - 4.123 | 1  | 4.1 | 1  | 4.2 |
| 3HFL | 223 | 2.6/0.19 | 1.512 - 5.056 | 1  | 2.7 | 1  | 3.6 |
| 3HFM | 220 | 3.0/0.24 | 1.029 - 3.993 | 5  | 1.5 | 8  | 1.0 |
| 6FAB | 228 | 1.9/0.20 | 1.193 - 4.636 | 1  | 4.3 | 1  | 3.5 |
| 7FAB | 219 | 2.0/0.16 | 1.845 - 4.547 | 1  | 4.7 | 1  | 4.8 |
| 8FAB | 228 | 1.8/0.17 | 1.913 - 6.816 | 1  | 4.4 | 1  | 4.9 |

(C).

| PDB ID | Length (aa) | Resol (Å) / R | RMSD (Å) range of decoys | $CS_{gl}$ |          | $CS_{cp}$ |          |
|--------|-------------|---------------|--------------------------|-----------|----------|-----------|----------|
|        |             |               |                          | Rank      | $Z_{CS}$ | Rank      | $Z_{CS}$ |
| 1DVF   | 223         | 1.9/0.19      | 0.706 - 4.176            | 1         | 3.4      | 1         | 3.4      |
| 1FGV   | 227         | 1.9/0.18      | 0.977 - 4.502            | 1         | 2.9      | 1         | 2.9      |
| 1FLR   | 228         | 1.9/0.19      | 1.090 - 4.284            | 1         | 3.0      | 1         | 3.0      |
| 1FVC   | 229         | 2.2/0.18      | 1.505 - 4.970            | 1         | 2.9      | 1         | 2.9      |
| 1GAF   | 221         | 2.0/0.24      | 0.841 - 4.034            | 1         | 3.1      | 1         | 2.8      |
| 1HIL   | 233         | 2.0/0.19      | 0.910 - 4.303            | 1         | 3.6      | 1         | 3.5      |
| 1IND   | 222         | 2.2/0.18      | 1.183 - 4.213            | 1         | 3.1      | 1         | 2.9      |
| 1KEM   | 231         | 2.2/0.18      | 1.386 - 4.671            | 1         | 2.1      | 1         | 2.1      |
| 1MFA   | 229         | 1.7/0.16      | 2.053 - 4.805            | 1         | 3.3      | 1         | 3.3      |
| 1MLB   | 223         | 2.1/0.18      | 0.899 - 4.186            | 1         | 2.6      | 1         | 2.8      |
| 1NBV   | 232         | 2.0/0.24      | 1.205 - 4.237            | 1         | 2.3      | 1         | 2.1      |
| 1OPG   | 232         | 2.0/0.16      | 1.379 - 4.795            | 1         | 1.1      | 1         | 1.2      |
| 1VFA   | 224         | 1.8/0.15      | 1.135 - 4.080            | 1         | 3.2      | 1         | 3.2      |
| 1VGE   | 231         | 2.0/0.18      | 1.619 - 5.004            | 1         | 3.5      | 1         | 3.3      |
| 2CGR   | 228         | 2.2/0.21      | 0.925 - 4.226            | 1         | 2.9      | 1         | 3.1      |



|      |     |          |               |   |     |   |     |
|------|-----|----------|---------------|---|-----|---|-----|
| 2FB4 | 236 | 1.9/0.18 | 1.667 - 6.135 | 1 | 3.3 | 1 | 3.4 |
| 2FBJ | 224 | 2.0/0.19 | 1.078 - 4.204 | 1 | 3.1 | 1 | 3.1 |
| 6FAB | 228 | 1.9/0.20 | 1.193 - 4.636 | 1 | 2.8 | 1 | 2.4 |
| 7FAB | 219 | 2.0/0.16 | 1.845 - 4.547 | 1 | 3.3 | 1 | 3.4 |
| 8FAB | 228 | 1.8/0.17 | 1.913 - 6.816 | 1 | 3.2 | 1 | 3.5 |

**Table S8. Performance of  $CS_{gl}$  and  $CS_{cp}$  in identifying the native crystal structures in the Rosetta all atom decoy set (20).**  $N_{dec}$  and **Resol** stands for the number of decoys for each native structure and its crystallographic resolution. **RMSD** refers to the  $C^\alpha$ -rms deviation of the decoy closest to the native in the set.  $Z_{CS}$  denotes the native Z-scores for the corresponding function ( $CS_{gl}/CS_{cp}$ ). The dataset was downloaded from: [http://trimer.tamu.edu/~daniel/decoys\\_11-14-01.tar.gz](http://trimer.tamu.edu/~daniel/decoys_11-14-01.tar.gz).

| PDB ID | Length (aa) | class          | Resol (Å) | $N_{dec}$ | RMSD (Å) | $CS_{gl}$ |          | $CS_{cp}$ |          |
|--------|-------------|----------------|-----------|-----------|----------|-----------|----------|-----------|----------|
|        |             |                |           |           |          | Rank      | $Z_{CS}$ | Rank      | $Z_{CS}$ |
| 1A32   | 65          | All $\alpha$   | 2.1       | 1610      | 0.90     | 1         | 5.3      | 1         | 5.0      |
| 1AIL   | 67          | All $\alpha$   | 1.9       | 1807      | 1.97     | 1         | 6.1      | 1         | 6.4      |
| 1AM3   | 57          | All $\alpha$   | 1.7       | 1898      | 1.80     | 1         | 7.4      | 1         | 6.5      |
| 1BQ9   | 53          | All $\beta$    | 1.2       | 1825      | 2.79     | 1         | 7.1      | 1         | 6.8      |
| 1CC5   | 76          | All $\alpha$   | 2.5       | 1892      | 4.31     | 36        | 1.6      | 58        | 1.3      |
| 1CEI   | 85          | All $\alpha$   | 1.8       | 1897      | 4.57     | 1         | 8.6      | 1         | 8.5      |
| 1CSP   | 64          | All $\beta$    | 2.45      | 1809      | 3.24     | 1         | 8.5      | 1         | 7.2      |
| 1CTF   | 67          | $\alpha \beta$ | 1.70      | 1922      | 2.66     | 1         | 9.7      | 1         | 9.1      |
| 1DOL   | 62          | $\alpha+\beta$ | 2.4       | 1871      | 3.76     | 1         | 7.1      | 1         | 6.8      |
| 1HYP   | 75          | All $\alpha$   | 1.8       | 1893      | 4.05     | 1         | 6.3      | 1         | 6.1      |
| 1LFB   | 69          | All $\alpha$   | 2.8       | 1893      | 2.47     | 1         | 5.2      | 1         | 6.1      |
| 1MSI   | 60          | All $\beta$    | 1.25      | 1894      | 5.40     | 1         | 10.6     | 1         | 10.1     |
| 1MZM   | 71          | All $\alpha$   | 1.78      | 1934      | 2.69     | 1         | 6.1      | 1         | 5.8      |
| 1ORC   | 56          | $\alpha+\beta$ | 1.54      | 1883      | 2.81     | 1         | 8.3      | 1         | 9.6      |
| 1PGX   | 57          | $\alpha+\beta$ | 1.66      | 1851      | 1.48     | 1         | 7.3      | 1         | 7.3      |
| 1PTQ   | 43          | All $\beta$    | 1.95      | 1885      | 5.42     | 1         | 7.1      | 1         | 7.1      |
| 1R69   | 61          | All $\alpha$   | 2.00      | 1733      | 1.38     | 1         | 6.0      | 1         | 5.7      |
| 1TIF   | 59          | $\alpha+\beta$ | 1.80      | 1849      | 2.60     | 1         | 8.5      | 1         | 9.1      |
| 1TUC   | 61          | All $\beta$    | 2.02      | 1894      | 4.48     | 1         | 6.6      | 1         | 6.6      |
| 1UTG   | 62          | All $\alpha$   | 1.34      | 1897      | 3.36     | 1         | 7.1      | 1         | 4.7      |
| 1VCC   | 77          | $\alpha+\beta$ | 1.60      | 1857      | 3.85     | 1         | 8.1      | 1         | 9.0      |
| 1VIF   | 48          | All $\beta$    | 1.80      | 1896      | 0.44     | 1         | 5.7      | 1         | 6.4      |
| 2FXB   | 81          | $\alpha \beta$ | 0.92      | 1800      | 5.48     | 2         | 3.3      | 1         | 3.7      |
| 5ICB   | 72          | All $\alpha$   | 1.50      | 1870      | 2.98     | 1         | 8.0      | 1         | 7.8      |
| 5PTI   | 55          | $\alpha+\beta$ | 1.00      | 1853      | 3.94     | 1         | 5.9      | 1         | 6.1      |

**Table S9. Performance of  $CS_{gl}$  and  $CS_{cp}$  in CASP9 dataset (21).** CASP9 experiment (conducted in July – August, 2010) consisted of 129 accepted targets out of which 18 were cancelled during the experiment. Of the remaining 111, 90 were X-ray crystal structures. T0543-2XRQ and T0605-3NMD were not considered in the calculation, the former due to its huge chain length (887 residues) and the latter being a single standalone helix. Results are tabulated for all other valid crystal structure targets.  $N_{mod}$  stands for the number of ‘first models’ used in the calculations. **Resol/ $R_{obs}$**  represent the crystallographic resolution and R-factor (observed) of the native structure respectively. **RMSD** refers to the  $C^\alpha$ -rms deviation of the model closest to the native in the set, calculated by Dali server (24).  $N_{res}$  refers to the number of residues to be modeled for each target. **Rank** and  $Z_{CS}$  denotes the native rank and Z-scores for the corresponding function ( $CS_{gl}/CS_{cp}$ ). For the target T0602-3NKZ, none of the models was superposable to the native by Dali server (22) (RMSD: N/A).

| Target ID | $N_{res}$ (aa) | PDB ID | Resol (Å) / $R_{obs}$ | $N_{mod}$ | RMSD (Å) | $CS_{gl}$ |          | $CS_{cp}$ |          |
|-----------|----------------|--------|-----------------------|-----------|----------|-----------|----------|-----------|----------|
|           |                |        |                       |           |          | Rank      | $Z_{CS}$ | Rank      | $Z_{CS}$ |
| T0515     | 365            | 3MT1   | 2.50, 0.194           | 130       | 2.2      | 1         | 6.0      | 1         | 6.1      |
| T0516     | 229            | 3NO6   | 1.65, 0.167           | 89        | 2.0      | 1         | 3.8      | 2         | 3.8      |
| T0517     | 159            | 3PNX   | 1.92, 0.191           | 127       | 1.6      | 1         | 4.0      | 1         | 4.0      |
| T0518     | 288            | 3NMB   | 2.40, 0.172           | 79        | 1.5      | 1         | 3.8      | 1         | 4.0      |
| T0520     | 189            | 3MR7   | 2.60, 0.184           | 144       | 2.0      | 3         | 2.6      | 3         | 2.6      |
| T0521     | 179            | 3MSE   | 2.10, 0.224           | 85        | 1.3      | 1         | 4.2      | 1         | 4.5      |
| T0522     | 134            | 3NRD   | 2.06, 0.170           | 87        | 0.8      | 1         | 3.6      | 1         | 3.4      |
| T0523     | 120            | 3MQO   | 1.70, 0.226           | 131       | 1.1      | 2         | 3.5      | 2         | 3.4      |
| T0524     | 325            | 3MWX   | 1.45, 0.149           | 82        | 1.8      | 1         | 5.4      | 1         | 5.5      |
| T0525     | 215            | 3MQZ   | 1.30, 0.150           | 82        | 2.1      | 1         | 5.1      | 1         | 5.1      |
| T0526     | 290            | 3NRE   | 1.59, 0.162           | 124       | 2.0      | 1         | 4.4      | 1         | 4.3      |
| T0527     | 142            | 3MR0   | 2.35, 0.224           | 85        | 1.9      | 1         | 3.5      | 1         | 3.6      |
| T0528     | 388            | 3NOX   | 1.50, 0.149           | 89        | 2.5      | 1         | 5.8      | 1         | 5.7      |
| T0529     | 569            | 3MWT   | 1.98, 0.183           | 50        | 1.3      | 1         | 2.4      | 1         | 2.4      |
| T0530     | 115            | 3NPP   | 2.15, 0.181           | 83        | 1.6      | 1         | 3.8      | 2         | 3.5      |
| T0532     | 506            | 3MX3   | 2.00, 0.167           | 50        | 1.9      | 1         | 3.0      | 1         | 3.0      |
| T0534     | 384            | 3N8U   | 1.44, 0.168           | 126       | 2.7      | 1         | 3.7      | 1         | 3.7      |
| T0537     | 381            | 3N6Z   | 1.30, 0.167           | 145       | 2.6      | 1         | 5.7      | 1         | 5.7      |
| T0540     | 90             | 3MX7   | 1.76, 0.178           | 138       | 2.3      | 1         | 5.2      | 1         | 4.9      |
| T0542     | 590            | 3N05   | 2.35, 0.233           | 50        | 1.5      | 1         | 2.7      | 1         | 2.7      |
| T0547     | 611            | 3NZP   | 3.00, 0.183           | 50        | 2.8      | 1         | 2.0      | 1         | 2.0      |
| T0548     | 106            | 3NNQ   | 2.69, 0.234           | 86        | 3.0      | 1         | 2.9      | 1         | 2.8      |
| T0550     | 339            | 3NQK   | 2.61, 0.200           | 107       | 2.7      | 1         | 5.3      | 1         | 5.3      |
| T0558     | 294            | 3NO2   | 1.35, 0.147           | 129       | 2.2      | 1         | 6.7      | 1         | 6.7      |
| T0561     | 161            | 2XSE   | 1.90, 0.176           | 129       | 2.9      | 1         | 2.7      | 1         | 3.0      |
| T0563     | 279            | 3ON7   | 2.20, 0.187           | 88        | 1.9      | 1         | 5.1      | 1         | 5.2      |
| T0565     | 326            | 3NPF   | 1.72, 0.142           | 87        | 1.8      | 1         | 5.8      | 1         | 5.7      |

|       |     |      |             |     |     |   |     |   |     |
|-------|-----|------|-------------|-----|-----|---|-----|---|-----|
| T0566 | 156 | 3N72 | 1.77, 0.191 | 140 | 2.1 | 1 | 3.2 | 1 | 3.7 |
| T0567 | 145 | 3N70 | 2.80, 0.233 | 91  | 1.8 | 3 | 1.3 | 5 | 1.2 |
| T0568 | 158 | 3N6Y | 1.50, 0.182 | 114 | 2.5 | 1 | 3.8 | 1 | 4.1 |
| T0570 | 258 | 3N70 | 2.80, 0.233 | 91  | 1.6 | 1 | 4.7 | 1 | 4.9 |
| T0571 | 344 | 3N91 | 2.40, 0.183 | 108 | 2.3 | 1 | 3.9 | 1 | 3.8 |
| T0573 | 311 | 3OOX | 1.44, 0.170 | 92  | 1.8 | 1 | 4.0 | 1 | 4.2 |
| T0574 | 126 | 3NRF | 1.50, 0.186 | 113 | 2.2 | 1 | 4.4 | 1 | 4.4 |
| T0575 | 216 | 3NRG | 2.56, 0.209 | 93  | 1.6 | 3 | 2.7 | 1 | 2.8 |
| T0576 | 172 | 3NA2 | 2.29, 0.190 | 110 | 2.1 | 1 | 5.9 | 1 | 6.0 |
| T0578 | 164 | 3NAT | 2.92, 0.206 | 107 | 2.1 | 1 | 3.4 | 1 | 3.4 |
| T0580 | 105 | 3NBM | 1.30, 0.134 | 141 | 1.3 | 1 | 3.1 | 1 | 3.0 |
| T0581 | 136 | 3NPD | 1.60, 0.162 | 93  | 1.8 | 1 | 3.3 | 1 | 3.3 |
| T0582 | 222 | 3O14 | 1.70, 0.154 | 128 | 1.9 | 1 | 3.9 | 1 | 4.0 |
| T0584 | 352 | 3NF2 | 2.20, 0.233 | 145 | 1.7 | 1 | 2.9 | 1 | 2.8 |
| T0585 | 234 | 3NE8 | 1.24, 0.161 | 94  | 1.6 | 3 | 2.7 | 4 | 2.6 |
| T0586 | 125 | 3NEU | 1.58, 0.195 | 145 | 1.0 | 1 | 3.3 | 1 | 3.3 |
| T0588 | 400 | 3NFV | 1.95, 0.158 | 138 | 2.8 | 1 | 4.5 | 1 | 4.5 |
| T0589 | 465 | 3NET | 2.70, 0.219 | 87  | 1.8 | 1 | 3.8 | 1 | 3.8 |
| T0591 | 406 | 3NRA | 2.15, 0.156 | 88  | 1.8 | 1 | 3.8 | 1 | 3.8 |
| T0592 | 144 | 3NHV | 2.50, 0.199 | 141 | 1.3 | 1 | 3.1 | 1 | 2.8 |
| T0593 | 208 | 3NGW | 2.31, 0.187 | 88  | 2.2 | 1 | 3.8 | 1 | 3.9 |
| T0594 | 140 | 3NI8 | 2.50, 0.226 | 141 | 1.4 | 1 | 3.3 | 1 | 3.4 |
| T0596 | 213 | 3NI7 | 2.78, 0.250 | 143 | 1.3 | 7 | 1.7 | 7 | 1.8 |
| T0597 | 429 | 3NIE | 2.30, 0.225 | 86  | 1.9 | 1 | 2.8 | 1 | 2.7 |
| T0598 | 161 | 3NJC | 1.69, 0.188 | 135 | 2.5 | 7 | 1.5 | 5 | 1.4 |
| T0599 | 399 | 3OS6 | 2.40, 0.173 | 89  | 1.3 | 1 | 3.5 | 1 | 3.5 |
| T0601 | 449 | 3QTD | 2.70, 0.227 | 82  | 1.4 | 1 | 3.4 | 1 | 3.4 |
| T0602 | 123 | 3NKZ | 2.11, 0.158 | 148 | N/A | 4 | 1.6 | 5 | 1.5 |
| T0603 | 305 | 3NKD | 1.95, 0.220 | 90  | 1.6 | 2 | 3.8 | 1 | 3.9 |
| T0604 | 549 | 3NLC | 2.15, 0.218 | 50  | 1.5 | 1 | 2.5 | 1 | 2.5 |
| T0606 | 169 | 3NOH | 1.60, 0.161 | 123 | 1.7 | 1 | 4.4 | 1 | 4.7 |
| T0607 | 471 | 3PFE | 1.50, 0.139 | 88  | 2.5 | 1 | 2.9 | 1 | 2.9 |
| T0608 | 279 | 3NYY | 1.60, 0.150 | 134 | 2.1 | 1 | 4.6 | 1 | 4.7 |
| T0609 | 340 | 3OS7 | 1.80, 0.145 | 87  | 2.1 | 1 | 3.8 | 1 | 3.8 |
| T0610 | 186 | 3OT2 | 1.96, 0.217 | 138 | 1.8 | 1 | 4.6 | 1 | 4.7 |
| T0611 | 227 | 3NNR | 2.49, 0.232 | 90  | 2.1 | 1 | 3.2 | 1 | 3.2 |
| T0613 | 287 | 3OBI | 1.95, 0.236 | 91  | 1.1 | 2 | 2.2 | 2 | 2.2 |
| T0615 | 179 | 3NQW | 2.90, 0.213 | 92  | 1.9 | 2 | 2.3 | 3 | 2.2 |
| T0616 | 103 | 3NRT | 2.54, 0.201 | 104 | 3.2 | 2 | 2.8 | 2 | 2.6 |
| T0617 | 148 | 3NRV | 2.00, 0.198 | 91  | 1.7 | 1 | 3.2 | 1 | 3.2 |
| T0618 | 182 | 3NRH | 1.80, 0.198 | 133 | 2.9 | 1 | 2.9 | 1 | 2.8 |
| T0619 | 111 | 3NRW | 1.70, 0.187 | 148 | 1.1 | 1 | 3.4 | 1 | 3.6 |
| T0620 | 312 | 3NR8 | 2.80, 0.216 | 85  | 1.2 | 1 | 3.9 | 1 | 4.1 |
| T0621 | 172 | 3NKG | 2.00, 0.172 | 65  | 2.9 | 1 | 3.5 | 1 | 3.4 |
| T0622 | 138 | 3NKL | 1.90, 0.169 | 151 | 1.6 | 2 | 2.6 | 2 | 2.3 |

|       |     |      |             |     |     |    |     |    |     |
|-------|-----|------|-------------|-----|-----|----|-----|----|-----|
| T0623 | 220 | 3NKH | 2.50, 0.158 | 88  | 1.8 | 1  | 3.7 | 1  | 3.9 |
| T0624 | 81  | 3NRL | 1.90, 0.219 | 96  | 2.2 | 2  | 2.6 | 1  | 2.9 |
| T0625 | 233 | 3ORU | 1.11, 0.127 | 123 | 1.9 | 1  | 3.6 | 1  | 3.5 |
| T0626 | 283 | 3OIL | 2.20, 0.175 | 91  | 1.2 | 1  | 5.0 | 1  | 5.3 |
| T0627 | 261 | 3OQL | 2.54, 0.178 | 142 | 2.1 | 10 | 0.7 | 10 | 0.8 |
| T0628 | 295 | 3NUW | 2.09, 0.174 | 142 | 2.8 | 1  | 4.1 | 1  | 4.1 |
| T0629 | 216 | 2XGF | 2.20, 0.182 | 95  | 2.1 | 1  | 5.1 | 1  | 4.8 |
| T0632 | 168 | 3NWZ | 2.57, 0.233 | 90  | 1.0 | 3  | 2.5 | 1  | 3.1 |
| T0634 | 140 | 3N53 | 2.20, 0.252 | 91  | 1.3 | 4  | 2.4 | 4  | 2.3 |
| T0635 | 191 | 3N1U | 1.80, 0.178 | 85  | 0.6 | 2  | 3.3 | 2  | 3.6 |
| T0636 | 336 | 3P1T | 2.60, 0.202 | 87  | 1.5 | 1  | 5.5 | 1  | 5.5 |
| T0638 | 269 | 3NXH | 2.58, 0.247 | 90  | 1.6 | 1  | 3.5 | 1  | 3.3 |
| T0639 | 128 | 3NYM | 1.90, 0.175 | 81  | 1.3 | 1  | 3.9 | 1  | 3.8 |
| T0640 | 250 | 3NYW | 2.16, 0.236 | 90  | 2.0 | 1  | 4.6 | 1  | 4.6 |
| T0641 | 296 | 3NYI | 1.90, 0.171 | 89  | 1.8 | 1  | 4.2 | 1  | 4.2 |
| T0643 | 83  | 3NZL | 1.20, 0.150 | 134 | 2.1 | 1  | 3.2 | 1  | 3.4 |

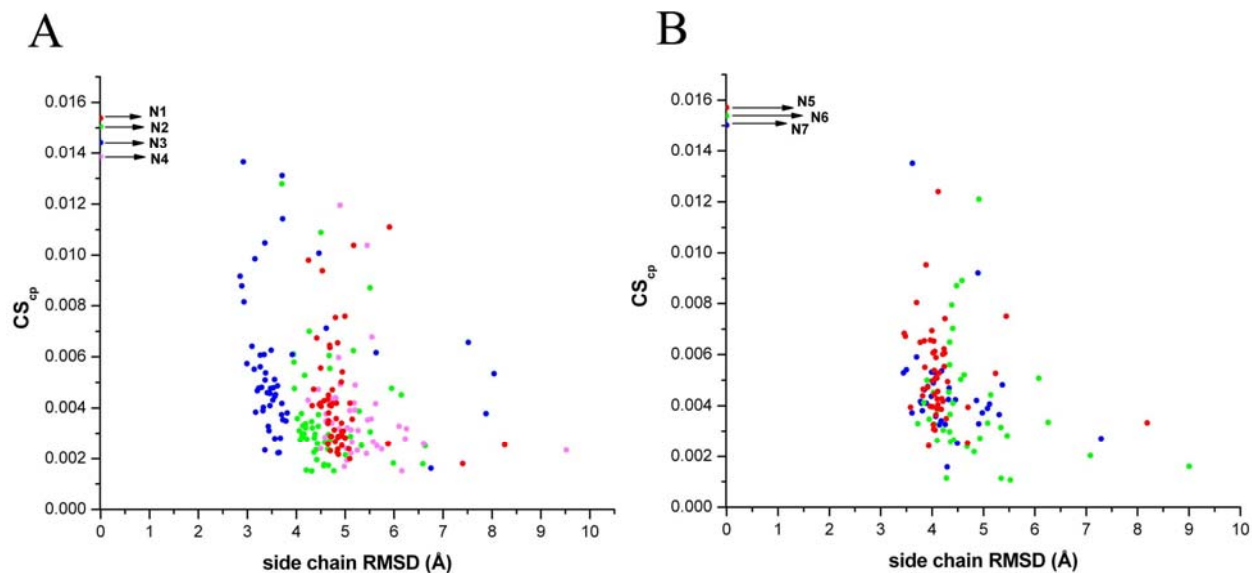

**Figure S5. Complementarity Scores fall with increased deviations from the native side chain coordinates although with substantial scatter.**  $CS_{cp}$  values plotted as a function of side chain rmsd's for 7 CASP9 targets (native and models). In **(A)** N1, N2, N3, N4 correspond to the native crystal structures of the CASP9 targets: T0610 (3OT2), T0526 (3NRE), T0580 (3NBM), T0593 (3NGW) and their corresponding models plotted in red, green, blue and light magenta respectively. In **(B)** N5, N6, N7 correspond to native CASP9 targets: T0640 (3NYW), T0582 (3O14), T0573 (3OOX), and their corresponding models plotted in red, green, and blue respectively. Models which were non-superposable to the native (by Dali server **(22)**) were excluded from the calculations. A similar pattern was obtained for  $CS_{gl}$ .

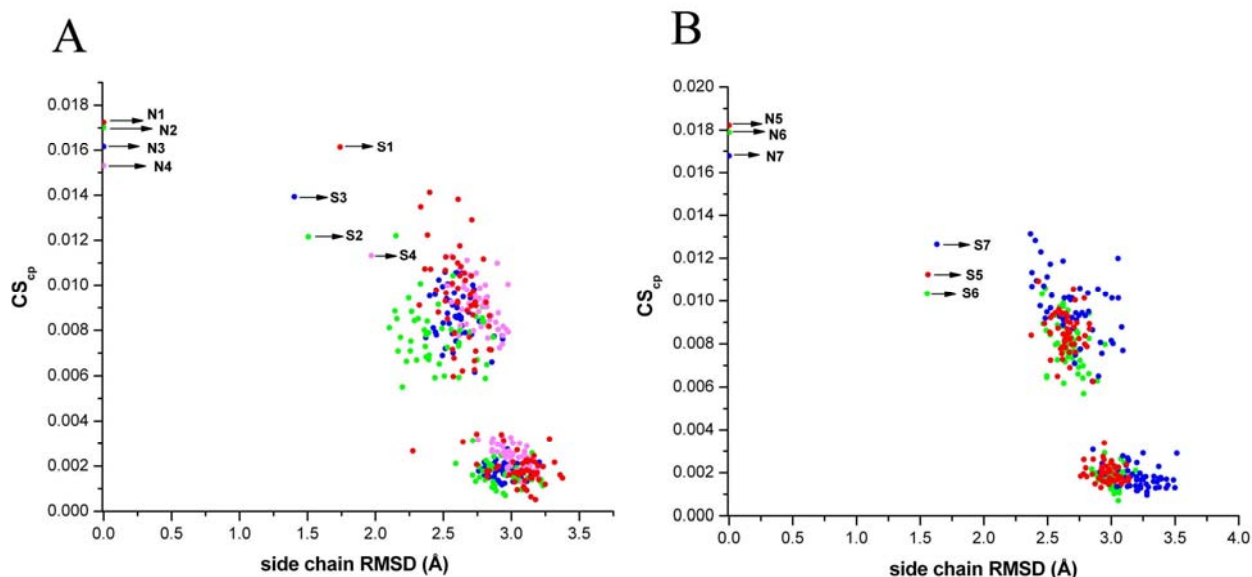

**Figure S6. Complementarity Scores drop with increased errors incorporated in a native structure with backbone fixed and randomization of the side chain conformers.** The figure plots the  $CS_{cp}$  values as a function of side chain rmsd's for 7 globular proteins from **DB2** and their models (See **Main Text**). The models for each native included 50 structures with randomized conformers, the same 50 structures, energy minimized subsequent to randomization of the side chain torsions and a unique solution generated by SCWRL4.0 (**23**) upon threading. In **(A)** N1, N2, N3, N4 and S1, S2, S3, S4 correspond to the native structures and the unique solutions generated by SCWRL4.0 respectively for 2O37 (red), 1DJR (green), 1C02 (blue), 1TUA (light magenta). In **(B)** N5, N6, N7 and S5, S6, S7 correspond to the native structures and the unique solutions generated by SCWRL4.0 respectively for 3CHM (red), 2O70 (green), 2PQR (blue). In most cases (except for 2PQR and 2O70), the models derived from SCWRL4.0 (c) gave values closest to the native, significantly distinguished from the other two clusters. The cluster corresponding to the native structures which gave superior scores relative to the cluster corresponding to the energy minimized structures which gave superior scores relative to the cluster corresponding to the randomized conformers. Similar patterns have been obtained for  $CS_{gl}$ .

**Dataset S2. Description of the 100 pairs of polypeptide chains (low sequence identity, same fold) used in the calculation from the PREFAB 4.0 database (24).** PDB ID of each pair (separated by a front slash) along with their chain identifier (underscored) is given. The protein class, Fold and sequence identity (%) upon structural alignment (by Dali server (22)) are also provided in parentheses separated by comma. For polypeptide chains with their N and C terminal domains falling under two distinct folds both of which being separately used in the calculation involving different pairs, the relevant stretches of residues are also mentioned.

1BPW\_A/1EUH\_A ( $\alpha|\beta$ , ALDH-like, 30), 2CPL/2NUL (all  $\beta$ , Cyclophilin-like, 30), 1AMY/1JDC ( $\alpha|\beta$ , TIM-barrel, 30), 1HYT/1EZM ( $\alpha+\beta$ , Zincin-like, 30), 1PSR\_A/4ICB (all  $\alpha$ , EF hand-like, 30), 1AUK\_A/1FSU ( $\alpha|\beta$ , Alkaline phosphatase-like, 30), 1C8N\_C/1SMV\_A (all  $\beta$ , Nucleoplasmin-like, 29), 1A7S/2CGA\_B (all  $\beta$ , Trypsin-like serine proteases, 29), 1AQU\_A/1FML\_B ( $\alpha|\beta$ , P-loop containing nucleoside triphosphate hydrolases, 29), 1NOX/1BKJ\_A ( $\alpha+\beta$ , FMN-dependent nitroreductase-like, 29), 1G4U\_S/1YTW ( $\alpha|\beta$ , Phosphotyrosine protein phosphatases II, 29), 1AC5/1CPY ( $\alpha|\beta$ , alpha/beta-Hydrolases, 29), 1CG5\_B/1GCW\_C (all  $\alpha$ , Globin-like, 28), 1HTN/1RTM\_1 ( $\alpha+\beta$ , C-type lectin-like, 28), 1ZIN/5UKD\_A ( $\alpha|\beta$ , P-loop containing nucleoside triphosphate hydrolases, 28), 1PVL/7AHL\_A (all  $\beta$ , Leukocidin-like, 28), 2DKB/2OAT\_C ( $\alpha|\beta$ , PLP-dependent transferase-like, 28), 1B5L/1WU3 (all  $\beta$ , 4-helical cytokines, 28), 1BBH\_A/1JAF\_B (all  $\alpha$ , Four-helical up-and-down bundle, 27), 1CPC\_A/1ALL\_A (all  $\alpha$ , Globin-like, 27), 1A3K/1LCL (all  $\beta$ , glucanases, 27), 1BDB/1YBV\_A ( $\alpha|\beta$ , NADP-binding Rossmann-fold domains 27), 1D4T\_A/1JWO\_A ( $\alpha+\beta$ , SH2-like, 27), 1PNE/3NUL ( $\alpha+\beta$ , Profilin-like, 27), 1NBC\_A/1TF4\_A: 461-605 (all  $\beta$ , Common fold of diphtheria toxin 27), 1IMB\_A/1JP4\_A (Multidomain, Carbohydrate phosphatase, 27), 1BBZ\_A/1CKA\_A (all  $\beta$ , SH3-like barrel, 26), 1HMT/1LFO (all  $\beta$ , Lipocalins, 26), 1NWP\_A/1QH\_Q\_A (all  $\beta$ , Cupredoxin-like, 26), 1BXX\_A/1XEL ( $\alpha|\beta$ , NADP-binding Rossmann-fold domains 26), 1DB1\_A/2LBD (all  $\alpha$ , Nuclear receptor ligand-binding domain, 26), 1FMK/1HCL ( $\alpha+\beta$ , Protein kinase-like, 26), 1MUP/1BJ7 (all  $\beta$ , Lipocalins, 25), 1BEC/1TVD\_A (all  $\beta$ , Immunoglobulin-like beta-sandwich, 25), 1CPT/1F4T\_A (all  $\alpha$ , Cytochrome P450, 25), 1DPE/1JEV\_A ( $\alpha|\beta$ , Periplasmic binding protein-like II, 25), 1ATG/1WOD ( $\alpha|\beta$ , Periplasmic binding protein-like II 24), 1GCA/2DRI ( $\alpha|\beta$ , Periplasmic binding protein-like I, 24), 1OVA\_A/1SEK (Multidomain, Serpins, 24), 1D3G\_A/2DOR\_A ( $\alpha|\beta$ , TIM-barrel, 24), 1RHS/1E0C\_A ( $\alpha|\beta$ , Rhodanese, 24), 1VFR\_A/1NOX ( $\alpha+\beta$ , FMN-dependent nitroreductase-like, 24), 1PSR\_A/1CLL (all  $\alpha$ , EF Hand-like, 24), 1ERV/1THX ( $\alpha|\beta$ , Thioredoxin, 23), 1DCI\_A/1EF8\_A ( $\alpha|\beta$ , Crotonase, 23), 1F7C\_A/1TX4\_A (all  $\alpha$ , GTPase activation domain, 23), 1CLC/1TF4\_A: 1-460 (all  $\alpha$ , alpha/alpha toroid, 23), 1G55\_A/6MHT\_A ( $\alpha|\beta$ , SAM-dependent methyltransferases, 23), 1AQT/1E79\_H (all  $\beta$ , Epsilon subunit of F1F0-ATP synthase N-terminal domain, 22), 1FIT/1KPF ( $\alpha+\beta$ , HIT-like, 22), 1CIP\_A/1HUR\_A ( $\alpha|\beta$ , P-loop containing nucleoside triphosphate hydrolases, 22), 1H8U/1RTM ( $\alpha+\beta$ , C-type lectin-like, 21), 1DUN/1DUP\_A (all  $\beta$ , beta-clip, 21), 1AH7/1CA1 (all  $\alpha$ , Phospholipase C, 21), 1GKY/1NKS\_A ( $\alpha|\beta$ , P-loop containing nucleoside triphosphate hydrolases, 21), 1FDR/1FNC\_A: 155-314 (Multidomain, Ferredoxin reductase-like, 21), 1ENY/1YBV\_A ( $\alpha|\beta$ , NADP-binding Rossmann-fold domains, 21), 1CY5/3YGS\_P (all  $\alpha$ , DEATH domain, 20), 1D4V\_B/2TNF\_A (all  $\beta$ , TNF-like, 21), 1AMP/1XJO ( $\alpha|\beta$ , Phosphorylase, 20), 1BKR\_A/1AOA (all  $\alpha$ , CH domain-like, 20), 1DCE\_B/1FT1\_B (all  $\alpha$ , alpha-alpha toroid, 19), 1DCF\_A/3CHY ( $\alpha|\beta$ , Flavodoxin-like, 19), 1H75\_A/1KTE ( $\alpha|\beta$ ,

Thioredoxin fold, 19), 1BSV\_A/1XEL ( $\alpha|\beta$ , NADP-binding Rossmann-fold domains, 19), 1PDR/1KWA\_A (all  $\beta$ , PDZ domain-like, 19), 1BQG/2MNR ( $\alpha+\beta$ , Enolase N-terminal domain-like, 19), 1COZ\_A/1IHO\_A ( $\alpha|\beta$ , Adenine nucleotide alpha hydrolase-like, 19), 1DAA\_A/1EKF\_A (Multidomain, D-aminoacid aminotransferase-like PLP-dependent enzymes, 18), 1HLB/2FAL (all  $\alpha$ , Globin-like, 18), 1FAO\_A/1MAI (all  $\beta$ , PH domain-like barrel, 18), 1NEU/1TVD\_A (all  $\beta$ , Immunoglobulin-like beta-sandwich, 17), 1GAK\_A/1LIS (all  $\alpha$ , Fertilization-protein, 17), 1PLC/1RCY (all  $\beta$ , Cupredoxin-like, 17), 1CNT\_3/1LKI (all  $\alpha$ , 4-helical cytokines, 16), 1FNC\_A: 19-154/2PIA (all  $\beta$ , Reductase, 16), 1PTY/1YTW ( $\alpha|\beta$ , Phosphotyrosine protein phosphatases II16), 1AWC\_A/2HTS (all  $\alpha$ , DNA/RNA-binding 3-helical bundle, 16), 1MFA/1NEU (all  $\beta$ , Immunoglobulin-like beta-sandwich, 15), 1AM2/1AT0 (all  $\beta$ , Hedgehog C-terminal Hog auto processing domain, 14), 1RCB/1LKI (all  $\alpha$ , 4-helical cytokines, 14), 1KUH/1IAE ( $\alpha+\beta$ , Zincin-like, 14), 1MPG/1MUN (all  $\alpha$ , DNA-glycosylase, 14), 1QFO\_A/1CCZ\_A (all  $\beta$ , Immunoglobulin-like beta-sandwich, 13), 1GSA/2HGS\_A ( $\alpha|\beta$ , Pre-ATP Grasp-domain, 13), 1FKN\_A/1HVC (all  $\beta$ , Acid proteases, 13), 1DAP\_A/1HYH\_A ( $\alpha|\beta$ , NADP-binding Rossmann-fold domains, 13), 1ASH/2FAL (all  $\alpha$ , Globin-like, 12), 1JFU\_A/1PRX\_A ( $\alpha|\beta$ , Thioredoxin, 12), 1FDS/1HE2\_A ( $\alpha|\beta$ , NADP-binding Rossmann-fold domains, 12), 1AX8/1RCB (all  $\alpha$ , 4-helical cytokines, 12), 1HAN/1CJX\_A ( $\alpha+\beta$ , Glyoxalase, 12), 153L/1CNS\_A ( $\alpha+\beta$ , Lysozyme-like, 12), 1BI0/1SMT\_A (all  $\alpha$ , DNA/RNA-binding 3-helical bundle11), 1H97\_A/2HBG (all  $\alpha$ , Globin-like, 11), 1BOB\_A/1QSM ( $\alpha+\beta$ , Acyl-CoA N-acyltransferases, 11), 1FOF\_A/1E25\_A (Multidomain,  $\beta$ -lactamase, 11), 1AMJ/1ZYM ( $\alpha|\beta$ , The "swivelling" beta/beta/alpha domain, 9), 1FR9\_A/1FGX\_A ( $\alpha|\beta$ , Nucleotide-diphospho-sugar transferases 7), 1FLT\_X/1QA9\_A (all  $\beta$ , Immunoglobulin-like beta-sandwich, 6)



**Table S10. Performance of  $CS_{gl}$  and  $CS_{cp}$  in detecting cross threaded sequences with low identity ( $\leq 30\%$ ) and same fold (from the PREFAB 4.0 database (24)), amongst random decoys.** The first column tabulates PDB ID, chain identifier (underscored) of the two polypeptide chain separated by a front slash followed by their sequence identity (%) and rms deviations ( $\text{\AA}$ ) upon structural alignment respectively (in parentheses). N1 and N2 refer to the two native structures respectively. 1on2 and 2on1 represent the cross-threaded structures, where, for example, ‘1on2’ refers to the sequence of N1 threaded onto the backbone of N2.  $Z_{CS}$  denotes the native Z-scores for the corresponding function ( $CS_{gl}/CS_{cp}$ ).

| PDB ID<br>(seq id(%),<br>rmsd( $\text{\AA}$ )) | $CS_{gl}$ |      |      |      |                        |          | $CS_{cp}$ |        |        |        |                            |          |
|------------------------------------------------|-----------|------|------|------|------------------------|----------|-----------|--------|--------|--------|----------------------------|----------|
|                                                | N1        | N2   | 1on2 | 2on1 | Random<br>Decoys       | $Z_{CS}$ | N1        | N2     | 1on2   | 2on1   | Random<br>Decoys           | $Z_{CS}$ |
| 1BPW/1EUH<br>(30, 1.7)                         | 3.33      | 3.94 | 1.28 | 1.49 | 0.80<br>( $\pm 0.12$ ) | 4.9      | 0.0132    | 0.0159 | 0.0050 | 0.0060 | 0.0030<br>( $\pm 0.0006$ ) | 4.2      |
| 2CPL/2NUL<br>(30, 1.8)                         | 4.30      | 4.21 | 1.42 | 1.45 | 0.76<br>( $\pm 0.14$ ) | 4.8      | 0.0175    | 0.0164 | 0.0061 | 0.0055 | 0.0031<br>( $\pm 0.0007$ ) | 4.7      |
| 1AMY/1JDC<br>(30, 2.0)                         | 3.90      | 3.93 | 1.07 | 1.22 | 0.71<br>( $\pm 0.15$ ) | 2.9      | 0.0160    | 0.0153 | 0.0041 | 0.0044 | 0.0026<br>( $\pm 0.0006$ ) | 2.8      |
| 1HYT/1EZM<br>(30, 2.1)                         | 3.63      | 3.94 | 1.14 | 1.40 | 0.75<br>( $\pm 0.16$ ) | 3.3      | 0.0140    | 0.0158 | 0.0050 | 0.0057 | 0.0032<br>( $\pm 0.0006$ ) | 3.6      |
| 1PSR/4ICB<br>(30, 2.1)                         | 3.84      | 3.00 | 1.52 | 0.91 | 0.79<br>( $\pm 0.15$ ) | 2.8      | 0.0151    | 0.0125 | 0.0053 | 0.0035 | 0.0030<br>( $\pm 0.0007$ ) | 2.0      |
| 1AUK/1FSU<br>(30, 2.4)                         | 3.52      | 3.53 | 1.34 | 0.84 | 0.72<br>( $\pm 0.14$ ) | 2.6      | 0.0134    | 0.0137 | 0.0048 | 0.0037 | 0.0030<br>( $\pm 0.0005$ ) | 2.5      |
| 1C8N/1SMV<br>(29, 1.5)                         | 3.62      | 3.24 | 1.20 | 1.10 | 0.72<br>( $\pm 0.13$ ) | 3.3      | 0.0143    | 0.0130 | 0.0048 | 0.0045 | 0.0030<br>( $\pm 0.0005$ ) | 3.3      |
| 1A7S/2CGA<br>(29, 1.7)                         | 3.80      | 3.21 | 1.04 | 1.45 | 0.70<br>( $\pm 0.15$ ) | 3.6      | 0.0147    | 0.0137 | 0.0042 | 0.0058 | 0.0029<br>( $\pm 0.0006$ ) | 3.5      |
| 1AQU/1FML<br>(29, 2.0)                         | 4.96      | 3.99 | 1.41 | 1.15 | 0.74<br>( $\pm 0.14$ ) | 3.9      | 0.0183    | 0.0157 | 0.0054 | 0.0044 | 0.0031<br>( $\pm 0.0005$ ) | 3.6      |
| 1NOX/1BKJ<br>(29, 2.1)                         | 3.91      | 3.46 | 1.00 | 1.07 | 0.79<br>( $\pm 0.15$ ) | 1.6      | 0.0152    | 0.0135 | 0.0041 | 0.0043 | 0.0030<br>( $\pm 0.0006$ ) | 2.0      |
| 1G4U/1YTW<br>(29, 2.5)                         | 3.49      | 3.91 | 1.22 | 1.45 | 0.76<br>( $\pm 0.15$ ) | 3.8      | 0.0147    | 0.0159 | 0.0046 | 0.0059 | 0.0029<br>( $\pm 0.0007$ ) | 3.4      |
| 1AC5/1CPY<br>(29, 2.5)                         | 3.34      | 2.22 | 0.74 | 1.23 | 0.74<br>( $\pm 0.13$ ) | 1.9      | 0.0130    | 0.0091 | 0.0030 | 0.0049 | 0.0027<br>( $\pm 0.0007$ ) | 1.8      |
| 1CG5/1GCW<br>(28, 1.5)                         | 4.01      | 3.62 | 1.13 | 1.35 | 0.78<br>( $\pm 0.16$ ) | 2.9      | 0.0161    | 0.0140 | 0.0050 | 0.0064 | 0.0031<br>( $\pm 0.0007$ ) | 3.7      |
| 1HTN/1RTM<br>(28, 1.6)                         | 2.56      | 3.13 | 1.43 | 0.77 | 0.70<br>( $\pm 0.15$ ) | 2.7      | 0.0108    | 0.0117 | 0.0059 | 0.0031 | 0.0027<br>( $\pm 0.0007$ ) | 2.6      |
| 1ZIN/5UKD<br>(28, 1.8)                         | 4.04      | 3.81 | 1.70 | 1.45 | 0.72<br>( $\pm 0.14$ ) | 6.1      | 0.0160    | 0.0145 | 0.0071 | 0.0057 | 0.0032<br>( $\pm 0.0005$ ) | 6.4      |
| 1PVL/7AHL<br>(28, 1.9)                         | 3.44      | 3.40 | 1.34 | 1.32 | 0.75<br>( $\pm 0.14$ ) | 4.1      | 0.0144    | 0.0130 | 0.0052 | 0.0052 | 0.0031<br>( $\pm 0.0007$ ) | 3.0      |
| 2DKB/2OAT<br>(28, 2.0)                         | 3.37      | 3.65 | 1.18 | 0.92 | 0.71<br>( $\pm 0.15$ ) | 2.3      | 0.0137    | 0.0144 | 0.0049 | 0.0036 | 0.0030<br>( $\pm 0.0006$ ) | 2.1      |
| 1B5L/1WU3<br>(28, 2.1)                         | 3.44      | 3.90 | 1.82 | 1.32 | 0.74<br>( $\pm 0.13$ ) | 6.4      | 0.0142    | 0.0151 | 0.0071 | 0.0053 | 0.0031<br>( $\pm 0.0005$ ) | 6.2      |
| 1BBH/1JAF<br>(27, 1.3)                         | 3.53      | 3.37 | 1.44 | 1.63 | 0.72<br>( $\pm 0.15$ ) | 5.4      | 0.0147    | 0.0139 | 0.0053 | 0.0061 | 0.0031<br>( $\pm 0.0005$ ) | 5.2      |
| 1CPC/1ALL<br>(27, 1.3)                         | 3.79      | 4.19 | 1.61 | 1.24 | 0.84<br>( $\pm 0.15$ ) | 3.9      | 0.0150    | 0.0177 | 0.0065 | 0.0053 | 0.0031<br>( $\pm 0.0006$ ) | 4.6      |
| 1A3K/1LCL                                      | 3.78      | 4.24 | 0.80 | 1.23 | 0.76                   | 1.8      | 0.0140    | 0.0164 | 0.0035 | 0.0045 | 0.0029                     | 1.8      |

|                        |      |      |      |      |                  |     |        |        |        |        |                      |     |
|------------------------|------|------|------|------|------------------|-----|--------|--------|--------|--------|----------------------|-----|
| (27, 1.5)              |      |      |      |      | (± 0.14)         |     |        |        |        |        | (± 0.0006)           |     |
| 1BDB/1YBV<br>(27, 1.6) | 3.68 | 3.90 | 1.49 | 1.24 | 0.76<br>(± 0.13) | 4.3 | 0.0147 | 0.0164 | 0.0057 | 0.0048 | 0.0030<br>(± 0.0006) | 3.8 |
| 1D4T/1JWO<br>(27, 1.7) | 3.86 | 2.23 | 1.40 | 1.79 | 0.71<br>(± 0.15) | 5.9 | 0.0156 | 0.0091 | 0.0054 | 0.0073 | 0.0031<br>(± 0.0006) | 5.4 |
| 1PNE/3NUL<br>(27, 1.8) | 4.00 | 4.01 | 1.28 | 1.90 | 0.75<br>(± 0.12) | 7.0 | 0.0159 | 0.0147 | 0.0054 | 0.0075 | 0.0028<br>(± 0.0006) | 6.1 |
| 1NBC/1TF4<br>(27, 2.1) | 4.29 | 4.26 | 1.08 | 0.95 | 0.69<br>(± 0.13) | 2.5 | 0.0156 | 0.0167 | 0.0042 | 0.0036 | 0.0029<br>(± 0.0006) | 1.8 |
| 1IMB/1JP4<br>(27, 2.6) | 3.76 | 3.89 | 1.29 | 1.01 | 0.71<br>(± 0.16) | 2.8 | 0.0152 | 0.0147 | 0.0053 | 0.0040 | 0.0029<br>(± 0.0007) | 2.5 |
| 1BBZ/1CKA<br>(26, 1.4) | 2.38 | 3.78 | 1.64 | 1.17 | 0.70<br>(± 0.14) | 5.0 | 0.0098 | 0.0180 | 0.0062 | 0.0041 | 0.0027<br>(± 0.0006) | 4.1 |
| 1HMT/1LFO<br>(26, 1.7) | 2.91 | 2.96 | 0.98 | 0.91 | 0.68<br>(± 0.13) | 2.1 | 0.0123 | 0.0110 | 0.0042 | 0.0041 | 0.0028<br>(± 0.0006) | 2.3 |
| 1NWP/1QHQ<br>(26, 1.8) | 3.42 | 3.97 | 1.43 | 1.17 | 0.71<br>(± 0.13) | 4.5 | 0.0135 | 0.0161 | 0.0061 | 0.0047 | 0.0026<br>(± 0.0004) | 5.6 |
| 1BXK/1XEL<br>(26, 2.1) | 3.68 | 4.04 | 1.13 | 1.03 | 0.73<br>(± 0.13) | 2.7 | 0.0142 | 0.0163 | 0.0045 | 0.0040 | 0.0030<br>(± 0.0005) | 2.5 |
| 1DBI/2LBD<br>(26, 2.1) | 3.81 | 3.53 | 1.45 | 1.69 | 0.78<br>(± 0.13) | 6.1 | 0.0157 | 0.0148 | 0.0057 | 0.0071 | 0.0031<br>(± 0.0005) | 6.6 |
| 1FMK/1HCL<br>(26, 2.5) | 3.28 | 3.82 | 1.41 | 1.59 | 0.77<br>(± 0.14) | 5.2 | 0.0132 | 0.0152 | 0.0053 | 0.0063 | 0.0029<br>(± 0.0006) | 4.8 |
| 1MUP/1BJ7<br>(25, 1.8) | 2.48 | 3.51 | 1.21 | 0.79 | 0.74<br>(± 0.14) | 1.9 | 0.0105 | 0.0137 | 0.0051 | 0.0034 | 0.0029<br>(± 0.0007) | 1.9 |
| 1BEC/1TVD<br>(25, 1.9) | 3.18 | 3.84 | 1.53 | 1.38 | 0.71<br>(± 0.14) | 5.3 | 0.0124 | 0.0147 | 0.0059 | 0.0054 | 0.0028<br>(± 0.0006) | 4.8 |
| 1CPT/1F4T<br>(25, 2.2) | 3.52 | 3.85 | 1.56 | 1.04 | 0.75<br>(± 0.17) | 3.2 | 0.0139 | 0.0153 | 0.0063 | 0.0043 | 0.0029<br>(± 0.0006) | 4.0 |
| 1DPE/1JEV<br>(25, 6.7) | 4.26 | 4.01 | 1.11 | 1.03 | 0.78<br>(± 0.15) | 1.9 | 0.0174 | 0.0161 | 0.0044 | 0.0040 | 0.0029<br>(± 0.0007) | 1.9 |
| 1ATG/1WOD<br>(24, 1.8) | 3.51 | 3.80 | 1.09 | 1.32 | 0.78<br>(± 0.12) | 3.5 | 0.0145 | 0.0144 | 0.0043 | 0.0056 | 0.0031<br>(± 0.0005) | 3.7 |
| 1GCA/2DRI<br>(24, 1.9) | 3.87 | 3.70 | 1.36 | 1.54 | 0.77<br>(± 0.14) | 4.9 | 0.0159 | 0.0146 | 0.0054 | 0.0060 | 0.0032<br>(± 0.0005) | 5.2 |
| 1OVA/1SEK<br>(24, 2.1) | 3.68 | 3.26 | 1.63 | 1.17 | 0.69<br>(± 0.15) | 4.7 | 0.0146 | 0.0126 | 0.0064 | 0.0047 | 0.0028<br>(± 0.0005) | 5.5 |
| 1D3G/2DOR<br>(24, 2.3) | 3.12 | 3.81 | 1.12 | 0.86 | 0.71<br>(± 0.12) | 2.3 | 0.0124 | 0.0151 | 0.0046 | 0.0036 | 0.0030<br>(± 0.0005) | 2.2 |
| 1RHS/1E0C<br>(24, 2.3) | 3.59 | 3.89 | 1.21 | 1.18 | 0.76<br>(± 0.13) | 3.3 | 0.0143 | 0.0155 | 0.0047 | 0.0045 | 0.0029<br>(± 0.0005) | 3.4 |
| 1VFR/1NOX<br>(24, 2.6) | 4.12 | 3.91 | 1.06 | 1.30 | 0.71<br>(± 0.13) | 3.6 | 0.0168 | 0.0152 | 0.0042 | 0.0054 | 0.0030<br>(± 0.0006) | 3.0 |
| 1PSR/1CLL<br>(24, 3.5) | 3.84 | 3.00 | 1.67 | 0.77 | 0.72<br>(± 0.14) | 3.6 | 0.0151 | 0.0125 | 0.0077 | 0.0033 | 0.0029<br>(± 0.0006) | 4.3 |
| 1ERV/1THX<br>(23, 1.8) | 4.37 | 4.21 | 1.12 | 1.01 | 0.74<br>(± 0.13) | 2.5 | 0.0185 | 0.0156 | 0.0044 | 0.0038 | 0.0027<br>(± 0.0006) | 2.3 |
| 1DCI/1EF8<br>(23, 2.0) | 3.43 | 3.52 | 1.42 | 1.50 | 0.76<br>(± 0.14) | 5.0 | 0.0138 | 0.0136 | 0.0060 | 0.0057 | 0.0029<br>(± 0.0007) | 4.2 |
| 1F7C/1TX4<br>(23, 2.4) | 4.27 | 4.23 | 1.82 | 1.60 | 0.79<br>(± 0.16) | 5.8 | 0.0160 | 0.0181 | 0.0071 | 0.0064 | 0.0031<br>(± 0.0006) | 6.1 |
| 1CLC/1TF4<br>(23, 2.5) | 4.09 | 4.44 | 0.95 | 1.38 | 0.78<br>(± 0.12) | 3.2 | 0.0164 | 0.0172 | 0.0040 | 0.0054 | 0.0031<br>(± 0.0005) | 3.2 |
| 1G55/6MHT<br>(23, 2.6) | 4.23 | 3.85 | 1.16 | 1.11 | 0.74<br>(± 0.12) | 3.3 | 0.0151 | 0.0150 | 0.0046 | 0.0044 | 0.0028<br>(± 0.0006) | 2.8 |

|                        |      |      |      |      |                  |     |        |        |        |        |                      |     |
|------------------------|------|------|------|------|------------------|-----|--------|--------|--------|--------|----------------------|-----|
| 1AQT/1E79<br>(22, 1.7) | 3.34 | 2.53 | 1.45 | 1.81 | 0.76<br>(± 0.15) | 5.8 | 0.0137 | 0.0096 | 0.0056 | 0.0065 | 0.0031<br>(± 0.0005) | 5.9 |
| 1FIT/1KPF<br>(22, 2.3) | 4.70 | 3.70 | 1.08 | 1.22 | 0.75<br>(± 0.14) | 2.9 | 0.0180 | 0.0146 | 0.0043 | 0.0045 | 0.0032<br>(± 0.0005) | 2.4 |
| 1CIP/1HUR<br>(22, 2.4) | 3.82 | 3.31 | 1.10 | 1.22 | 0.71<br>(± 0.14) | 3.2 | 0.0154 | 0.0135 | 0.0045 | 0.0047 | 0.0030<br>(± 0.0005) | 3.2 |
| 1H8U/1RTM<br>(21, 1.9) | 3.56 | 3.41 | 1.02 | 1.40 | 0.76<br>(± 0.12) | 3.8 | 0.0152 | 0.0146 | 0.0044 | 0.0056 | 0.0032<br>(± 0.0006) | 3.0 |
| 1DUN/1DUP<br>(21, 1.9) | 4.07 | 3.68 | 1.72 | 1.31 | 0.75<br>(± 0.15) | 5.1 | 0.0154 | 0.0136 | 0.0064 | 0.0059 | 0.0028<br>(± 0.0007) | 4.8 |
| 1AH7/1CA1<br>(21, 2.1) | 4.04 | 3.74 | 0.95 | 1.17 | 0.72<br>(± 0.12) | 2.8 | 0.0169 | 0.0144 | 0.0040 | 0.0043 | 0.0029<br>(± 0.0005) | 2.5 |
| 1GKY/1NKS<br>(21, 3.2) | 3.52 | 3.74 | 0.90 | 0.97 | 0.67<br>(± 0.13) | 2.0 | 0.0148 | 0.0144 | 0.0041 | 0.0037 | 0.0027<br>(± 0.0006) | 2.0 |
| 1FDR/1FNC<br>(21, 2.4) | 3.94 | 3.71 | 1.01 | 0.76 | 0.67<br>(± 0.12) | 1.8 | 0.0159 | 0.0146 | 0.0043 | 0.0035 | 0.0029<br>(± 0.0006) | 1.7 |
| 1ENY/1YBV<br>(21, 2.2) | 3.11 | 3.89 | 1.31 | 1.24 | 0.73<br>(± 0.10) | 5.5 | 0.0122 | 0.0164 | 0.0052 | 0.0050 | 0.0029<br>(± 0.0005) | 4.4 |
| 1D4V/2TNF<br>(21, 1.7) | 3.24 | 3.04 | 1.12 | 1.22 | 0.77<br>(± 0.14) | 2.9 | 0.0131 | 0.0162 | 0.0046 | 0.0045 | 0.0031<br>(± 0.0006) | 2.4 |
| 1CY5/3YGS<br>(20, 1.5) | 3.83 | 3.93 | 1.57 | 1.86 | 0.77<br>(± 0.13) | 7.3 | 0.0156 | 0.0157 | 0.0065 | 0.0079 | 0.0032<br>(± 0.0005) | 8.0 |
| 1AMP/1XJO<br>(20, 1.9) | 3.69 | 3.80 | 1.12 | 1.01 | 0.71<br>(± 0.12) | 3.0 | 0.0150 | 0.0146 | 0.0045 | 0.0042 | 0.0027<br>(± 0.0003) | 2.8 |
| 1BKR/1AOA<br>(20, 2.1) | 4.86 | 3.60 | 1.50 | 1.28 | 0.66<br>(± 0.15) | 4.9 | 0.0193 | 0.0153 | 0.0057 | 0.0053 | 0.0026<br>(± 0.0007) | 4.1 |
| 1DCE/1FT1<br>(19, 2.0) | 3.60 | 3.41 | 1.35 | 1.37 | 0.77<br>(± 0.11) | 5.4 | 0.0148 | 0.0136 | 0.0056 | 0.0056 | 0.0031<br>(± 0.0005) | 5.0 |
| 1DCF/3CHY<br>(19, 2.0) | 3.18 | 4.44 | 1.12 | 1.23 | 0.74<br>(± 0.13) | 3.3 | 0.0127 | 0.0171 | 0.0040 | 0.0045 | 0.0027<br>(± 0.0006) | 2.6 |
| 1H75/1KTE<br>(19, 2.0) | 3.82 | 3.94 | 1.04 | 1.75 | 0.75<br>(± 0.11) | 5.9 | 0.0154 | 0.0163 | 0.0042 | 0.0073 | 0.0031<br>(± 0.0005) | 5.3 |
| 1BSV/1XEL<br>(19, 2.3) | 3.76 | 4.04 | 1.00 | 1.51 | 0.79<br>(± 0.10) | 4.6 | 0.0147 | 0.0163 | 0.0040 | 0.0061 | 0.0029<br>(± 0.0005) | 4.3 |
| 1PDR/1KWA<br>(19, 2.4) | 3.62 | 2.85 | 1.34 | 0.75 | 0.73<br>(± 0.10) | 3.2 | 0.0140 | 0.0103 | 0.0056 | 0.0033 | 0.0027<br>(± 0.0006) | 2.9 |
| 1BQG/2MNR<br>(19, 2.4) | 3.34 | 3.87 | 1.08 | 1.36 | 0.70<br>(± 0.12) | 4.3 | 0.0132 | 0.0152 | 0.0044 | 0.0057 | 0.0030<br>(± 0.0005) | 4.1 |
| 1COZ/1IHO<br>(19, 3.1) | 3.97 | 3.67 | 0.81 | 1.29 | 0.72<br>(± 0.13) | 2.5 | 0.0143 | 0.0144 | 0.0036 | 0.0053 | 0.0031<br>(± 0.0005) | 2.7 |
| 1DAA/1EKF<br>(18, 2.1) | 4.11 | 3.37 | 1.08 | 0.96 | 0.73<br>(± 0.12) | 2.4 | 0.0159 | 0.0135 | 0.0043 | 0.0038 | 0.0030<br>(± 0.0005) | 2.1 |
| 1HLB/2FAL<br>(18, 2.5) | 2.38 | 3.61 | 1.25 | 1.35 | 0.69<br>(± 0.17) | 3.6 | 0.0094 | 0.0147 | 0.0049 | 0.0052 | 0.0030<br>(± 0.0005) | 4.1 |
| 1FAO/1MAI<br>(18, 3.1) | 3.79 | 3.47 | 0.93 | 1.38 | 0.76<br>(± 0.12) | 3.3 | 0.0155 | 0.0155 | 0.0039 | 0.0056 | 0.0029<br>(± 0.0006) | 3.1 |
| 1NEU/1TVD<br>(17, 2.0) | 3.76 | 3.82 | 0.78 | 1.17 | 0.69<br>(± 0.15) | 1.9 | 0.0149 | 0.0149 | 0.0034 | 0.0047 | 0.0030<br>(± 0.0006) | 1.8 |
| 1GAK/1LIS<br>(17, 2.0) | 4.03 | 4.33 | 1.32 | 0.94 | 0.71<br>(± 0.12) | 3.5 | 0.0171 | 0.0177 | 0.0054 | 0.0035 | 0.0030<br>(± 0.0005) | 2.9 |
| 1PLC/1RCY<br>(17, 2.5) | 3.79 | 3.97 | 1.03 | 1.10 | 0.73<br>(± 0.15) | 2.3 | 0.0146 | 0.0147 | 0.0040 | 0.0040 | 0.0028<br>(± 0.0006) | 2.0 |
| 1CNT/1LKI<br>(16, 2.4) | 3.75 | 3.69 | 1.06 | 1.30 | 0.68<br>(± 0.15) | 3.3 | 0.0161 | 0.0150 | 0.0044 | 0.0053 | 0.0030<br>(± 0.0006) | 3.1 |
| 1FNC/2PIA              | 3.71 | 3.62 | 1.01 | 0.91 | 0.71             | 1.7 | 0.0146 | 0.0149 | 0.0045 | 0.0036 | 0.0029               | 1.9 |

|                        |      |      |      |      |                  |     |        |        |        |        |                      |     |
|------------------------|------|------|------|------|------------------|-----|--------|--------|--------|--------|----------------------|-----|
| (16, 2.5)              |      |      |      |      | (± 0.15)         |     |        |        |        |        | (± 0.0006)           |     |
| 1PTY/1YTW<br>(16, 2.8) | 4.01 | 3.92 | 0.78 | 1.31 | 0.72<br>(± 0.13) | 2.5 | 0.0163 | 0.0162 | 0.0029 | 0.0053 | 0.0027<br>(± 0.0005) | 2.8 |
| 1AWC/2HTS<br>(16, 2.8) | 4.13 | 4.92 | 1.27 | 0.76 | 0.67<br>(± 0.11) | 3.1 | 0.0163 | 0.0198 | 0.0052 | 0.0032 | 0.0026<br>(± 0.0005) | 3.2 |
| 1MFA/1NEU<br>(15, 1.8) | 3.90 | 3.76 | 0.93 | 1.07 | 0.73<br>(± 0.15) | 2.3 | 0.0157 | 0.0149 | 0.0040 | 0.0043 | 0.0028<br>(± 0.0005) | 2.7 |
| 1AM2/1AT0<br>(14, 2.1) | 3.21 | 2.30 | 1.24 | 0.85 | 0.75<br>(± 0.12) | 2.4 | 0.0133 | 0.0094 | 0.0053 | 0.0038 | 0.0031<br>(± 0.0005) | 2.9 |
| 1RCB/1LKI<br>(14, 2.8) | 2.47 | 3.70 | 0.94 | 1.23 | 0.74<br>(± 0.11) | 3.1 | 0.0093 | 0.0150 | 0.0035 | 0.0052 | 0.0028<br>(± 0.0005) | 3.1 |
| 1KUH/1IAE<br>(14, 2.9) | 3.92 | 3.90 | 0.69 | 0.87 | 0.67<br>(± 0.10) | 1.1 | 0.0146 | 0.0167 | 0.0034 | 0.0035 | 0.0029<br>(± 0.0005) | 1.1 |
| 1MPG/1MUN<br>(14, 3.7) | 3.89 | 3.91 | 0.95 | 0.79 | 0.66<br>(± 0.10) | 2.1 | 0.0160 | 0.0160 | 0.0038 | 0.0032 | 0.0025<br>(± 0.0005) | 2.0 |
| 1QFO/1CCZ<br>(13, 2.2) | 4.11 | 4.08 | 1.36 | 1.34 | 0.70<br>(± 0.13) | 5.0 | 0.0168 | 0.0172 | 0.0057 | 0.0059 | 0.0029<br>(± 0.0005) | 5.8 |
| 1GSA/2HGS<br>(13, 3.5) | 3.72 | 3.33 | 0.91 | 0.68 | 0.71<br>(± 0.12) | 0.7 | 0.0150 | 0.0135 | 0.0034 | 0.0029 | 0.0026<br>(± 0.0005) | 1.1 |
| 1FKN/1HVC<br>(13, 3.8) | 3.97 | 3.67 | 0.80 | 1.24 | 0.74<br>(± 0.10) | 2.3 | 0.0158 | 0.0152 | 0.0037 | 0.0046 | 0.0028<br>(± 0.0005) | 2.7 |
| 1DAP/1HYH<br>(13, 4.6) | 3.19 | 3.89 | 1.27 | 1.01 | 0.76<br>(± 0.12) | 3.2 | 0.0115 | 0.0151 | 0.0051 | 0.0040 | 0.0029<br>(± 0.0005) | 3.3 |
| 1ASH/2FAL<br>(12, 1.8) | 4.10 | 3.65 | 0.89 | 1.43 | 0.75<br>(± 0.13) | 3.2 | 0.0158 | 0.0152 | 0.0032 | 0.0060 | 0.0027<br>(± 0.0006) | 3.2 |
| 1JFU/1PRX<br>(12, 2.3) | 3.66 | 3.60 | 1.01 | 1.00 | 0.70<br>(± 0.13) | 2.3 | 0.0155 | 0.0153 | 0.0041 | 0.0040 | 0.0030<br>(± 0.0005) | 2.1 |
| 1FDS/1HE2<br>(12, 2.5) | 3.85 | 3.88 | 0.80 | 1.23 | 0.70<br>(± 0.15) | 2.2 | 0.0148 | 0.0150 | 0.0035 | 0.0046 | 0.0029<br>(± 0.0005) | 2.3 |
| 1AX8/1RCB<br>(12, 2.6) | 3.86 | 2.47 | 1.64 | 0.90 | 0.71<br>(± 0.13) | 4.3 | 0.0159 | 0.0093 | 0.0062 | 0.0037 | 0.0031<br>(± 0.0006) | 3.1 |
| 1HAN/1CJX<br>(12, 2.9) | 3.64 | 4.08 | 0.85 | 0.70 | 0.65<br>(± 0.11) | 1.1 | 0.0151 | 0.0162 | 0.0034 | 0.0030 | 0.0026<br>(± 0.0005) | 1.2 |
| 153L/1CNS<br>(12, 3.8) | 3.98 | 3.51 | 0.79 | 0.65 | 0.67<br>(± 0.11) | 0.5 | 0.0160 | 0.0151 | 0.0028 | 0.0028 | 0.0026<br>(± 0.0005) | 0.4 |
| 1B10/1SMT<br>(11, 2.2) | 3.13 | 3.27 | 1.29 | 1.02 | 0.70<br>(± 0.11) | 4.1 | 0.0121 | 0.0142 | 0.0052 | 0.0043 | 0.0028<br>(± 0.0005) | 3.9 |
| 1H97/2HBG<br>(11, 2.4) | 4.25 | 3.99 | 0.83 | 1.40 | 0.76<br>(± 0.15) | 2.4 | 0.0167 | 0.0152 | 0.0034 | 0.0054 | 0.0029<br>(± 0.0006) | 2.5 |
| 1BOB/1QSM<br>(11, 3.4) | 3.84 | 3.20 | 1.03 | 0.89 | 0.69<br>(± 0.14) | 1.9 | 0.0150 | 0.0131 | 0.0039 | 0.0039 | 0.0029<br>(± 0.0005) | 2.0 |
| 1FOF/1E25<br>(11, 3.4) | 3.73 | 3.90 | 0.86 | 0.96 | 0.67<br>(± 0.12) | 2.0 | 0.0154 | 0.0152 | 0.0036 | 0.0039 | 0.0026<br>(± 0.0005) | 2.3 |
| 1AMJ/1ZYM<br>(9, 3.7)  | 3.92 | 1.94 | 1.09 | 1.95 | 0.78<br>(± 0.15) | 4.9 | 0.0158 | 0.0084 | 0.0042 | 0.0072 | 0.0032<br>(± 0.0006) | 4.2 |
| 1FR9/1FGX<br>(7, 3.9)  | 4.40 | 3.63 | 0.94 | 0.91 | 0.67<br>(± 0.12) | 2.1 | 0.0179 | 0.0145 | 0.0037 | 0.0037 | 0.0027<br>(± 0.0005) | 2.0 |
| 1FLT/1QA9<br>(6, 2.4)  | 2.97 | 2.30 | 0.86 | 0.75 | 0.69<br>(± 0.14) | 1.0 | 0.0127 | 0.0090 | 0.0034 | 0.0031 | 0.0026<br>(± 0.0005) | 1.3 |

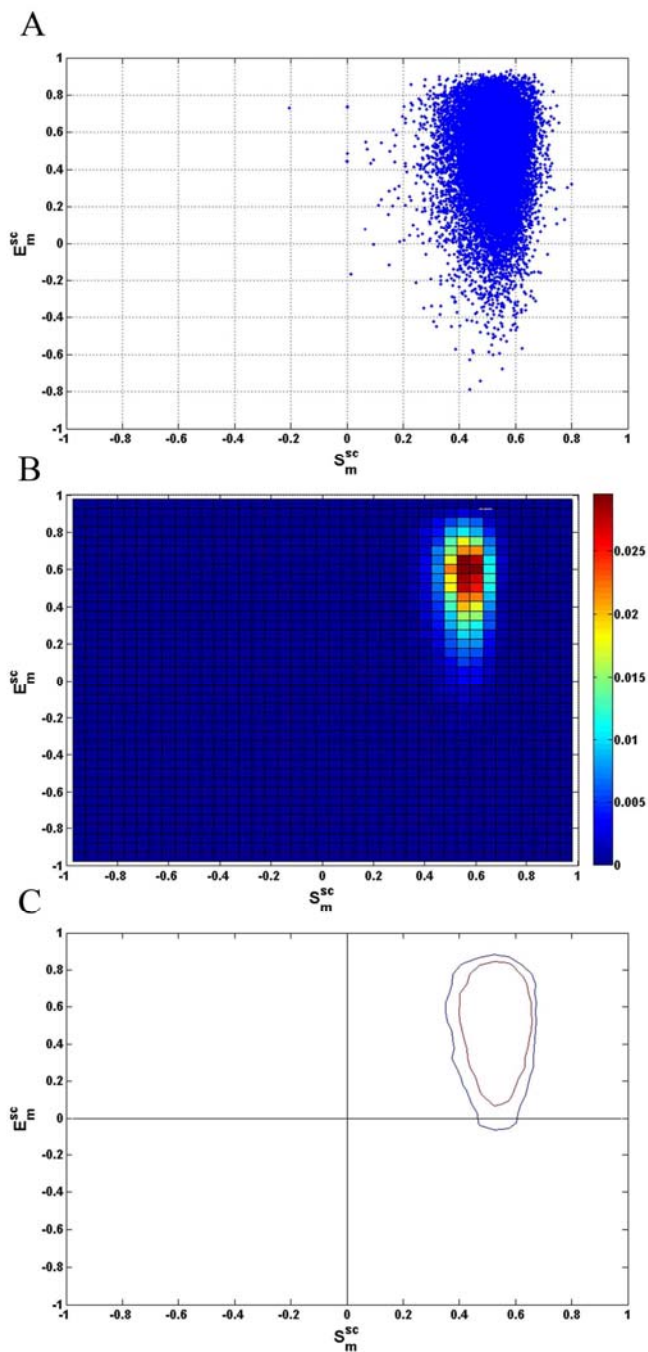

**Figure S7. CP1. The Complementarity plot for burial bin 1.** All plots span -1.0 to 1.0 in both the X ( $S_m^{sc}$ ) and Y ( $E_m^{sc}$ ) axes. (A) shows the distribution of (23850) residues in the first burial bin ( $0.0 \leq \text{Bur} \leq 0.05$ ) from **DB2**. (B) shows the probabilities to locate a point in each grid ( $P_{\text{grid}}$ ) of the plot with a color bar corresponding to the probability values and (C) the contour plot based on contour levels ( $P_{\text{grid}} \geq 0.005$  for the first contour level and  $\geq 0.002$  for the second) (see **Main Text**).

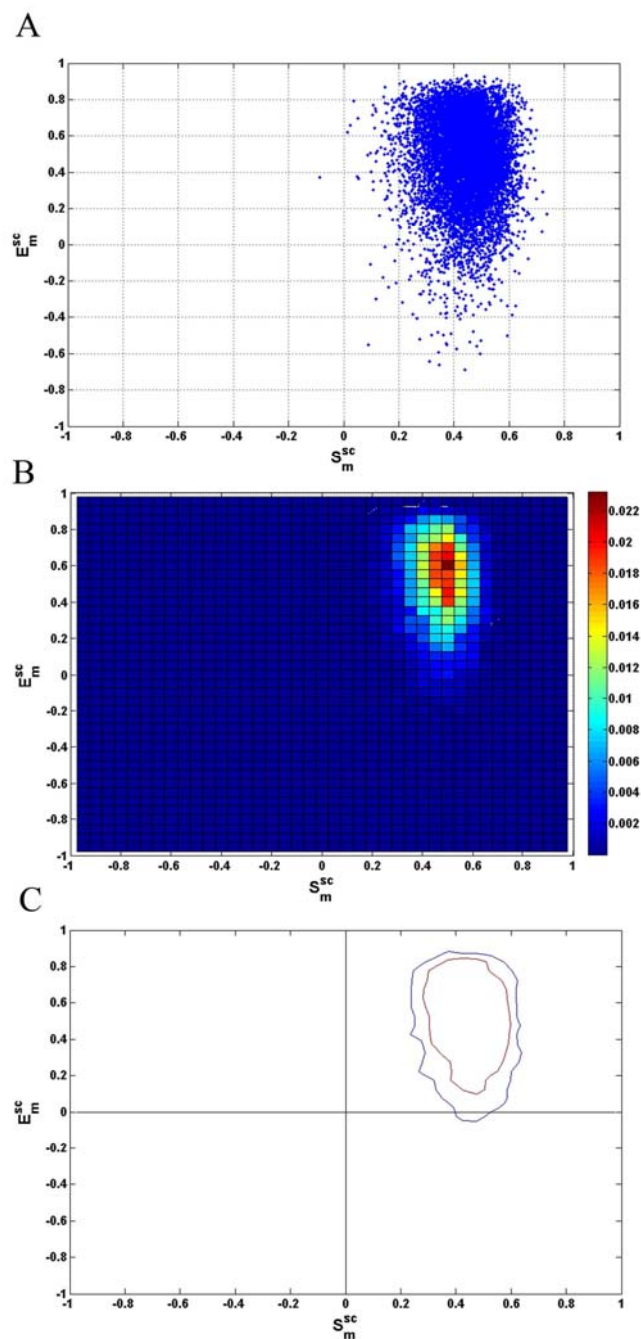

**Figure S8. CP2. The Complementarity plot for burial bin 2.** All plots span -1.0 to 1.0 in both the X ( $S_m^{sc}$ ) and Y ( $E_m^{sc}$ ) axes. (A) shows the distribution of (10624) residues in the second burial bin ( $0.05 < \text{Bur} \leq 0.15$ ) from **DB2**. (B) shows the probabilities to locate a point in each grid ( $P_{\text{grid}}$ ) of the plot with a color bar corresponding to the probability values and (C) the contour plot based on contour levels ( $P_{\text{grid}} \geq 0.005$  for the first contour level and  $\geq 0.002$  for the second) (see **Main Text**).

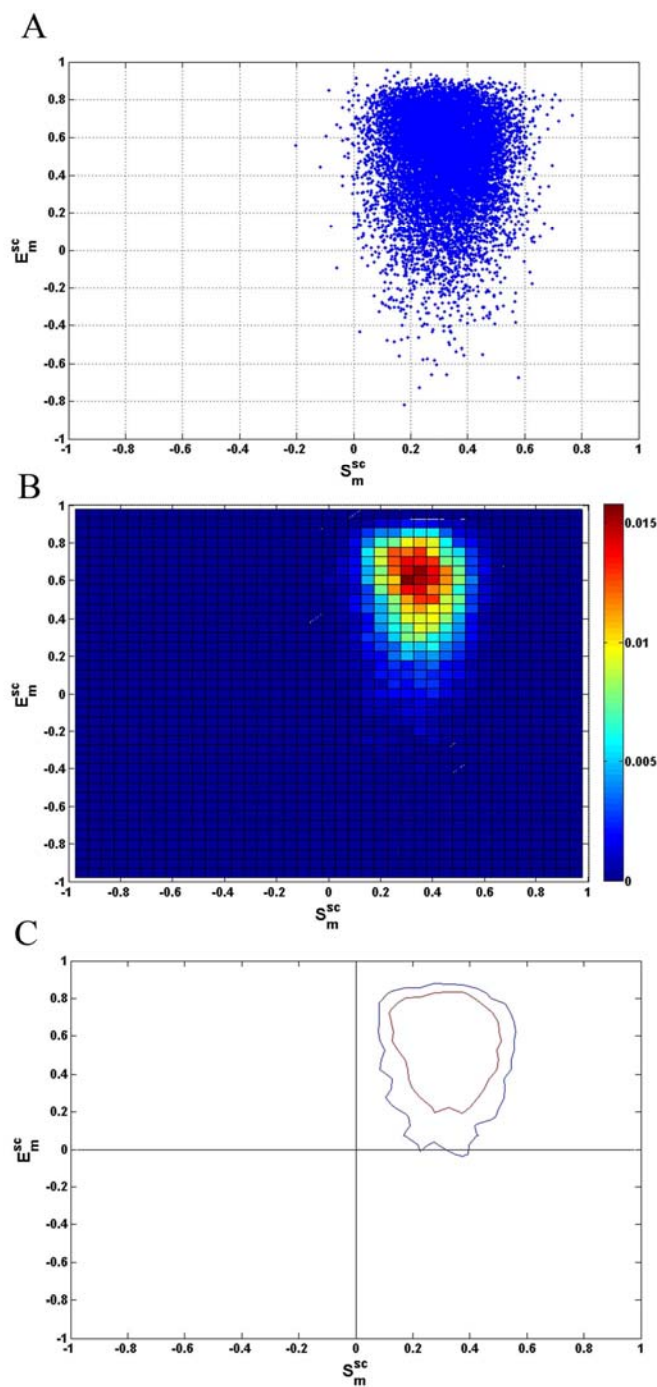

**Figure S9. CP3. The Complementarity plot for burial bin 3.** All plots span from -1.0 to 1.0 in both the X ( $S_m^{sc}$ ) and Y ( $E_m^{sc}$ ) axes. (A) shows the distribution of (13255) residues in the third burial bin ( $0.15 < \text{Bur} \leq 0.30$ ) from **DB2**. (B) shows the probabilities to locate a point in each grid ( $P_{\text{grid}}$ ) of the plot with a color bar corresponding to the probability values and (C) the contour plot based on contour levels ( $P_{\text{grid}} \geq 0.005$  for the first contour level and  $\geq 0.002$  for the second) (see **Main Text**).

**Table S11. Distribution of residues from Superseded and Upgraded pairs of structures plotted in CP1 ( $0.0 \leq \text{Bur} \leq 0.05$ ), CP2 ( $0.05 < \text{Bur} \leq 0.15$ ) and CP3 ( $0.15 < \text{Bur} \leq 0.30$ ).** Residues possibly in error in the superseded PDB files were detected by side chain rms deviation (method 1) **(A)** and deviation in ( $\chi_1$ ) torsion angles (method 2) **(B)** (see **Main Text**). The 1<sup>st</sup> and 2<sup>nd</sup> rows for each pair correspond to the upgraded and superseded PDB files respectively. The resolution, crystallographic R-factor and chain identifier (underscored) as was mentioned in the PDB (<ftp://ftp.wwpdb.org/pub/pdb/data/status/obsolete.dat>) are given in parentheses below each structure. All metal ions (as given in parentheses) were considered in the calculation. The number of residues from each PDB file falling in the three burial bins is given along with their distribution in ‘probable’, ‘less probable’ and ‘improbable’ regions in the appropriate CP (in parentheses separated by comma). For the 1<sup>st</sup> method (rmsd), all residues of the superseded structure, ‘2FD1’ were considered to be in error since it was non-superposable onto its upgraded partner ‘5FD1’ by Dali server (24). For 2HFL, 3HFL and 1YQV (the same antibody-antigen complex, solved at gradually improved resolutions), all chains (L, H, Y) were considered in the calculations.

**(A)**

| Pair No. | Pair                                       | Bin1                            | Bin2                          | Bin3                          |
|----------|--------------------------------------------|---------------------------------|-------------------------------|-------------------------------|
|          |                                            | $0.0 \leq \text{Bur} \leq 0.05$ | $0.05 < \text{Bur} \leq 0.15$ | $0.15 < \text{Bur} \leq 0.30$ |
| 1        | 1ABE_A<br>(1.7, 0.137)                     | 26 (21, 3, 2)                   | 3 (3, 0, 0)                   | 8 (5, 3, 0)                   |
|          | 1ABP<br>(NA, NA)                           | 23 (5, 3, 15)                   | 3 (1, 0, 2)                   | 6 (3, 0, 3)                   |
| 2        | 2AMG_A (Ca <sup>+2</sup> )<br>(2.0, 0.178) | 15 (13, 0, 2)                   | -                             | 2 (1, 0, 1)                   |
|          | 1AMG (Ca <sup>+2</sup> )<br>(2.2, 0.174)   | 14 (11, 1, 2)                   | -                             | 3 (0, 1, 2)                   |
| 3        | 3HFL<br>(2.65, 0.196)                      | 23 (19, 2, 2)                   | 7 (3, 2, 2)                   | 11 (4, 3, 4)                  |
|          | 2HFL<br>(NA, NA)                           | 25 (11, 2, 12)                  | 6 (3, 2, 1)                   | 13 (3, 6, 4)                  |
| 4        | 1YQV<br>(1.7, 0.195)                       | 35 (28, 2, 5)                   | 9 (6, 1, 2)                   | 10 (7, 1, 2)                  |
|          | 2HFL<br>(NA, NA)                           | 35 (14, 4, 17)                  | 9 (3, 2, 4)                   | 11 (4, 4, 3)                  |
| 5        | 2F19<br>(2.8, 0.182)                       | 27 (17, 5, 5)                   | 9 (6, 2, 1)                   | 18 (8, 4, 6)                  |
|          | 1F19<br>(NA, NA)                           | 20 (1, 0, 19)                   | 18 (1, 2, 15)                 | 13 (3, 3, 7)                  |
| 6        | 5FD1<br>(1.9, 0.215)                       | 21 (17, 1, 3)                   | 11 (7, 2, 2)                  | 17 (12, 3, 2)                 |



|    |                                             |               |              |              |
|----|---------------------------------------------|---------------|--------------|--------------|
|    | 2FD1<br>(NA, NA)                            | 4 (0, 1, 3)   | 10 (3, 0, 7) | 11 (2, 4, 5) |
| 7  | 3BJL_A<br>(2.3, 0.165)                      | 6 (3, 1, 2)   | 1 (1, 0, 0)  | 2 (1, 1, 0)  |
|    | 1BJL<br>(NA, NA)                            | 2 (1, 0, 1)   | 1 (0, 1, 0)  | 4 (0, 1, 3)  |
| 8  | 2DTR_A (Ca <sup>+2</sup> )<br>(1.9, 0.171)  | 5 (5, 0, 0)   | 2 (1, 1, 0)  | 2 (1, 1, 0)  |
|    | 1DTR<br>(2.8, 0.210)                        | 5 (4, 0, 1)   | -            | 4 (1, 2, 1)  |
| 9  | 7FAB_L<br>(2.0, 0.169)                      | 1 (1, 0, 0)   | 1 (0, 1, 0)  | 1 (1, 0, 0)  |
|    | 1FAB_L<br>(NA, NA)                          | 2 (2, 0, 0)   | 2 (1, 0, 1)  | 1 (0, 1, 0)  |
| 10 | 1A45_A<br>(2.3, 0.186)                      | 14 (11, 2, 1) | 1 (0, 1, 0)  | 2 (2, 0, 0)  |
|    | 2GCR<br>(NA, NA)                            | 11 (8, 1, 2)  | -            | 5 (0, 1, 4)  |
| 11 | 3EFZ_A<br>(2.08, 0.227)                     | 2 (2, 0, 0)   | -            | 1 (1, 0, 0)  |
|    | 2IJP<br>(2.14, 0.237)                       | 2 (0, 1, 1)   | -            | 1 (1, 0, 0)  |
| 12 | 5PTP_A (Ca <sup>+2</sup> )<br>(1.34, 0.152) | 10 (8, 2, 0)  | 2 (2, 0, 0)  | 7 (4, 3, 0)  |
|    | 1PTP (Mg <sup>+2</sup> )<br>(NA, NA)        | 9 (6, 0, 3)   | 2 (2, 0, 0)  | 6 (1, 2, 3)  |
| 13 | 4AAH_A (Ca <sup>+2</sup> )<br>(2.4, 0.152)  | 14 (12, 0, 2) | 1 (1, 0, 0)  | 3 (2, 1, 0)  |
|    | 3AAH_A (Ca <sup>+2</sup> )<br>(2.4, 0.201)  | 12 (5, 1, 6)  | 2 (2, 0, 0)  | 4 (0, 2, 2)  |
| 14 | 6LDH_A<br>(2.0, 0.202)                      | 6 (4, 1, 1)   | 5 (1, 0, 4)  | 5 (2, 0, 3)  |
|    | 2LDH<br>(NA, NA)                            | 4 (2, 1, 1)   | 4 (0, 2, 2)  | 6 (2, 2, 2)  |
| 15 | 3DFR_A<br>(1.7, 0.152)                      | 16 (16, 0, 0) | 6 (6, 0, 0)  | 7 (5, 2, 0)  |
|    | 1DFR<br>(NA, NA)                            | 10 (1, 3, 6)  | 6 (0, 0, 6)  | 6 (0, 4, 2)  |
| 16 | 5CPV_A (Ca <sup>+2</sup> )<br>(1.6, 0.187)  | 3 (2, 0, 1)   | -            | 2 (2, 0, 0)  |
|    | 1CPV (Ca <sup>+2</sup> )<br>(1.85, NA)      | 1 (0, 0, 1)   | -            | -            |

|    |                                         |                 |                |                 |
|----|-----------------------------------------|-----------------|----------------|-----------------|
| 17 | 3F70_A<br>(2.1, 0.203)                  | 23 (18, 2, 3)   | 2 (1, 0, 1)    | 10 (6, 0, 4)    |
|    | 3DBB_A<br>(2.15, 0.212)                 | 31 (25, 3, 3)   | 3 (2, 0, 1)    | 7 (1, 4, 1)     |
| 18 | 4CAA<br>(2.9, 0.199)                    | 14 (11, 2, 1)   | 2 (2, 0, 0)    | 2 (2, 0, 0)     |
|    | 1CT3_A<br>(3.1, 0.189)                  | 15 (9, 4, 2)    | 1 (1, 0, 0)    | 1 (1, 0, 0)     |
| 19 | 3CPA_A (Zn <sup>+2</sup> )<br>(2.0, NA) | 5 (5, 0, 0)     | -              | 2 (1, 0, 1)     |
|    | 1CPA (Zn <sup>+2</sup> )<br>(NA, NA)    | 3 (1, 0, 2)     | 2 (2, 0, 0)    | 1 (0, 1, 0)     |
| 20 | 1P2Z_A<br>(2.2, 0.178)                  | 88 (71, 11, 6)  | 35 (24, 4, 7)  | 61 (36, 17, 8)  |
|    | 1DHX_A<br>(2.9, 0.225)                  | 74 (19, 19, 36) | 38 (12, 3, 23) | 56 (13, 23, 20) |

(B)

| Pair No. | Pair                                       | Bin1<br>$0.0 \leq \text{Bur} \leq 0.05$ | Bin2<br>$0.05 < \text{Bur} \leq 0.15$ | Bin3<br>$0.15 < \text{Bur} \leq 0.30$ |
|----------|--------------------------------------------|-----------------------------------------|---------------------------------------|---------------------------------------|
| 1        | 1ABE_A<br>(1.7, 0.137)                     | 29 (22, 6, 1)                           | 9 (9, 0, 0)                           | 16 (10, 5, 1)                         |
|          | 1ABP<br>(NA, NA)                           | 26 (7, 2, 17)                           | 9 (5, 0, 4)                           | 12 (7, 2, 3)                          |
| 2        | 2AMG_A (Ca <sup>+2</sup> )<br>(2.0, 0.178) | 9 (7, 1, 1)                             | 1 (1, 0, 0)                           | 3 (2, 0, 1)                           |
|          | 1AMG (Ca <sup>+2</sup> )<br>(2.2, 0.174)   | 9 (6, 1, 2)                             | 2 (0, 0, 2)                           | 1 (0, 0, 1)                           |
| 3        | 3HFL<br>(2.65, 0.196)                      | 22 (15, 1, 6)                           | 14 (7, 2, 5)                          | 23 (8, 5, 10)                         |
|          | 2HFL<br>(NA, NA)                           | 23 (8, 2, 13)                           | 12 (5, 2, 5)                          | 18 (6, 9, 3)                          |
| 4        | 1YQV<br>(1.7, 0.195)                       | 17 (15, 1, 1)                           | 11 (6, 2, 3)                          | 15 (12, 1, 2)                         |
|          | 2HFL<br>(NA, NA)                           | 18 (5, 2, 11)                           | 10 (3, 4, 3)                          | 11 (4, 7, 0)                          |

|    |                                               |               |               |               |
|----|-----------------------------------------------|---------------|---------------|---------------|
| 5  | 2F19<br>(2.8, 0.182)                          | 19 (12, 4, 3) | 13 (8, 2, 3)  | 22 (8, 3, 11) |
|    | 1F19<br>(NA, NA)                              | 15 (1, 3, 11) | 14 (1, 1, 12) | 10 (3, 2, 5)  |
| 6  | 5FD1<br>(1.9, 0.215)                          | 13 (12, 0, 1) | 7 (5, 1, 1)   | 8 (6, 2, 0)   |
|    | 2FD1<br>(NA, NA)                              | -             | 5 (1, 0, 4)   | 2 (0, 1, 1)   |
| 7  | 3BJL_A<br>(2.3, 0.165)                        | 2 (1, 1, 0)   | 2 (1, 0, 1)   | 2 (1, 1, 0)   |
|    | 1BJL<br>(NA, NA)                              | -             | 3 (0, 0, 3)   | 2 (1, 0, 1)   |
| 8  | 2DTR_A<br>(Co <sup>+2</sup> )<br>(1.9, 0.171) | 4 (4, 0, 0)   | 8 (6, 2, 0)   | 6 (4, 2, 0)   |
|    | 1DTR<br>(2.8, 0.210)                          | 4 (2, 1, 1)   | 5 (3, 2, 0)   | 4 (0, 3, 1)   |
| 9  | 7FAB_L<br>(2.0, 0.169)                        | 3 (3, 0, 0)   | 1 (1, 0, 0)   | -             |
|    | 1FAB_L<br>(NA, NA)                            | 2 (1, 0, 1)   | 2 (1, 1, 0)   | -             |
| 10 | 1A45_A<br>(2.3, 0.186)                        | 7 (5, 2, 0)   | 1 (0, 1, 0)   | 7 (5, 1, 1)   |
|    | 2GCR<br>(NA, NA)                              | 6 (2, 0, 4)   | 3 (1, 0, 2)   | 5 (3, 0, 2)   |
| 11 | 3EFZ_A<br>(2.08, 0.227)                       | 1 (1, 0, 0)   | -             | 2 (1, 0, 1)   |
|    | 2IJP<br>(2.14, 0.237)                         | 1 (0, 0, 1)   | -             | 2 (1, 0, 1)   |
| 12 | 5PTP_A (Ca <sup>+2</sup> )<br>(1.34, 0.152)   | 8 (7, 1, 0)   | 3 (3, 0, 0)   | 11 (9, 2, 0)  |
|    | 1PTP (Mg <sup>+2</sup> )<br>(NA, NA)          | 8 (5, 1, 2)   | 1 (1, 0, 0)   | 10 (4, 2, 4)  |
| 13 | 4AAH_A<br>(Ca <sup>+2</sup> )<br>(2.4, 0.152) | 13 (12, 0, 1) | 3 (3, 0, 0)   | 2 (1, 1, 0)   |
|    | 3AAH_A<br>(Ca <sup>+2</sup> )<br>(2.4, 0.201) | 11 (3, 2, 6)  | 5 (5, 0, 0)   | 1 (0, 1, 0)   |
| 14 | 6LDH_A<br>(2.0, 0.202)                        | 2 (1, 1, 0)   | 2 (1, 0, 1)   | 4 (2, 0, 2)   |

|    |                                               |               |               |                |
|----|-----------------------------------------------|---------------|---------------|----------------|
|    | 2LDH<br>(NA, NA)                              | 1 (1, 0, 0)   | -             | 2 (1, 0, 1)    |
| 15 | 3DFR_A<br>(1.7, 0.152)                        | 7 (7, 0, 0)   | 10 (8, 1, 1)  | 13 (11, 2, 0)  |
|    | 1DFR<br>(NA, NA)                              | 4 (0, 1, 3)   | 15 (5, 3, 7)  | 9 (1, 4, 4)    |
| 16 | 5CPV_A<br>(Ca <sup>+2</sup> )<br>(1.6, 0.107) | 3 (2, 1, 0)   | 1 (1, 0, 0)   | 5 (5, 0, 0)    |
|    | 1CPV (Ca <sup>+2</sup> )<br>(1.85, NA)        | 2 (2, 0, 0)   | 2 (2, 0, 0)   | 1 (0, 1, 0)    |
| 17 | 3F70_A<br>(2.1, 0.203)                        | 4 (4, 0, 0)   | 2 (0, 1, 1)   | 11 (5, 1, 5)   |
|    | 3DBB_A<br>(2.15, 0.212)                       | 5 (3, 1, 1)   | 3 (1, 1, 1)   | 6 (3, 3, 0)    |
| 18 | 4CAA<br>(2.9, 0.199)                          | 9 (5, 1, 3)   | 10 (7, 3, 0)  | 10 (6, 4, 0)   |
|    | 1CT3_A<br>(3.1, 0.189)                        | 12 (6, 3, 3)  | 7 (5, 0, 2)   | 6 (4, 2, 0)    |
| 19 | 3CPA_A<br>(Zn <sup>+2</sup> )<br>(2.0, NA)    | 8 (7, 1, 0)   | 3 (2, 0, 1)   | 7 (5, 0, 2)    |
|    | 1CPA (Zn <sup>+2</sup> )<br>(NA, NA)          | 7 (3, 0, 4)   | 5 (2, 1, 2)   | 5 (2, 1, 2)    |
| 20 | 1P2Z_A<br>(2.2, 0.178)                        | 58 (45, 8, 5) | 20 (13, 2, 5) | 49 (26, 16, 7) |
|    | 1DHX_A<br>(2.9, 0.225)                        | 35 (8, 9, 18) | 17 (8, 0, 9)  | 29 (7, 8, 14)  |

**Table S12. Markedly different distributions of points from superseded and upgraded structures in the Complementarity Plots.** Frequencies of residues with positional errors from superseded pdb files along with frequencies of the same residues from upgraded structures, in the different regions of the complementarity plots. The same residue from the two sets could lie in different burial bins.  $\chi^2$  (df = 3-1: probable, less probable, improbable;  $\chi^2_{0.05} = 5.991$ ) between expected (from **DB2**) and observed (superseded and upgraded) distributions have been given. **(A)** tabulates the results for CP1 ( $0.0 \leq \text{Bur} \leq 0.05$ ) while **(B)** and **(C)** tabulate the same for CP2 ( $0.05 < \text{Bur} \leq 0.15$ ) and CP3 ( $0.15 < \text{Bur} \leq 0.3$ ). Errors were detected by side chain rmsd's (method 1, see **Main Text**).

**(A)**

| 0.0 ≤ Bur ≤ 0.05 |                       |               |               |            |          |
|------------------|-----------------------|---------------|---------------|------------|----------|
|                  | Total Count of points | Occupancy (%) |               |            | $\chi^2$ |
|                  |                       | Probable      | Less Probable | Improbable |          |
| Expected         | -                     | 82.1          | 9.2           | 8.7        | -        |
| Superseded       | 302                   | 41.4          | 14.6          | 44.0       | 503.950  |
| Upgraded         | 354                   | 80.2          | 9.6           | 10.2       | 1.093    |

**(B)**

| 0.05 < Bur ≤ 0.15 |                       |               |               |            |          |
|-------------------|-----------------------|---------------|---------------|------------|----------|
|                   | Total Count of points | Occupancy (%) |               |            | $\chi^2$ |
|                   |                       | Probable      | Less Probable | Improbable |          |
| Expected          | -                     | 76.1          | 13.9          | 10.0       | -        |
| Superseded        | 107                   | 30.8          | 11.2          | 58.0       | 275.308  |
| Upgraded          | 97                    | 66.0          | 14.4          | 19.6       | 10.242   |

(C)

| 0.15 < Bur ≤ 0.30 |                       |               |               |            |          |
|-------------------|-----------------------|---------------|---------------|------------|----------|
|                   | Total Count of points | Occupancy (%) |               |            | $\chi^2$ |
|                   |                       | Probable      | Less Probable | Improbable |          |
| Expected          | -                     | 70.7          | 16.8          | 12.5       | -        |
| Superseded        | 158                   | 22.2          | 38.6          | 39.2       | 187.782  |
| Upgraded          | 161                   | 56.5          | 24.2          | 19.3       | 15.736   |

**Table S13. Markedly different distributions of points from superseded and upgraded structures in the Complementarity Plots.** Frequencies of residues with positional errors from superseded pdb files along with frequencies of the same residues from upgraded structures, in the different regions of the complementarity plots. The same residue from the two sets could lie in different burial bins.  $\chi^2$  (df = 3-1: probable, less probable, improbable;  $\chi^2_{0.05} = 5.991$ ) between expected (from **DB2**) and observed (superseded and upgraded) distributions have been given. **(A)** tabulates the results for CP1 ( $0.0 \leq \text{Bur} \leq 0.05$ ) while **(B)** and **(C)** tabulate the same for CP2 ( $0.05 < \text{Bur} \leq 0.15$ ) and CP3 ( $0.15 < \text{Bur} \leq 0.3$ ). Errors were detected by deviation in  $\chi_1$  torsions (method 2, see **Main Text**).

(A)

| 0.0 ≤ Bur ≤ 0.05 |                       |               |      |            |          |
|------------------|-----------------------|---------------|------|------------|----------|
|                  | Total Count of points | Occupancy (%) |      |            | $\chi^2$ |
|                  |                       | Probable      | Less | Improbable |          |
| Expected         | -                     | 82.1          | 9.2  | 8.7        | -        |
| Superseded       | 189                   | 33.3          | 14.8 | 51.9       | 465.746  |
| Upgraded         | 228                   | 77.6          | 12.7 | 9.7        | 3.860    |

(B)

| 0.05 < Bur ≤ 0.15 |                       |               |               |            |          |
|-------------------|-----------------------|---------------|---------------|------------|----------|
|                   | Total Count of points | Occupancy (%) |               |            | $\chi^2$ |
|                   |                       | Probable      | Less Probable | Improbable |          |
| Expected          | -                     | 76.1          | 13.9          | 10.0       | -        |
| Superseded        | 120                   | 40.8          | 12.5          | 46.7       | 181.115  |

|          |     |      |      |      |       |
|----------|-----|------|------|------|-------|
| Upgraded | 121 | 67.8 | 14.0 | 18.2 | 9.205 |
|----------|-----|------|------|------|-------|

(C)

| 0.15 < Bur ≤ 0.30 |                       |               |               |            |          |
|-------------------|-----------------------|---------------|---------------|------------|----------|
|                   | Total Count of points | Occupancy (%) |               |            | $\chi^2$ |
|                   |                       | Probable      | Less Probable | Improbable |          |
| Expected          | -                     | 70.7          | 16.8          | 12.5       | -        |
| Superseded        | 136                   | 34.6          | 33.8          | 31.6       | 88.351   |
| Upgraded          | 216                   | 58.8          | 21.3          | 19.9       | 16.410   |

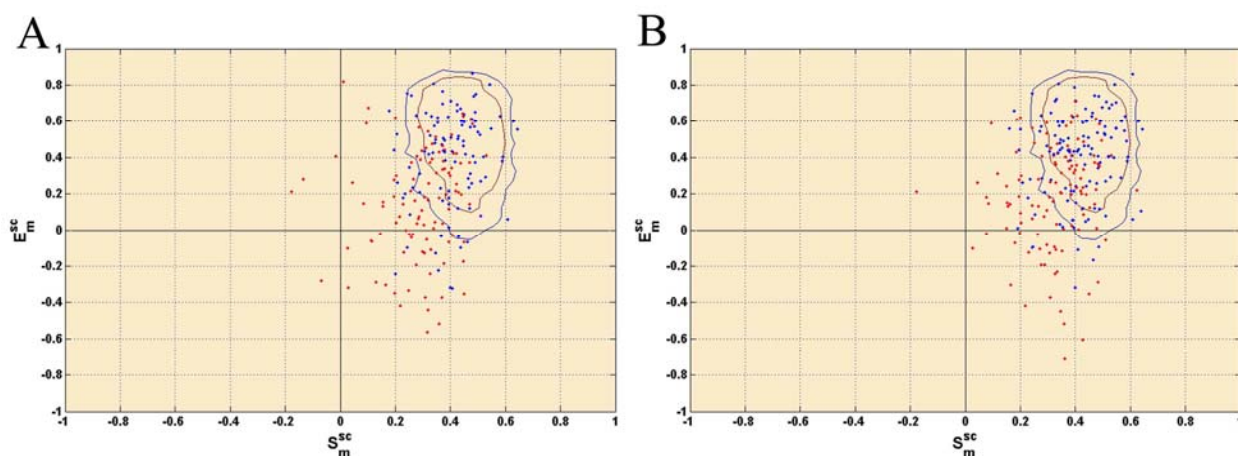

**Figure S10. Distribution of points in CP2.** Distribution of points corresponding to residues with coordinate errors in the superseded (plotted in blue) and the same residues in the upgraded structures (red) for CP2 ( $0.05 < \text{Bur} \leq 0.15$ ). In (A) the erroneous residues have been detected by method 1 (side chain rmsd) and in (B) by method 2 ( $\chi_1$  torsion) (see **Main Text**).

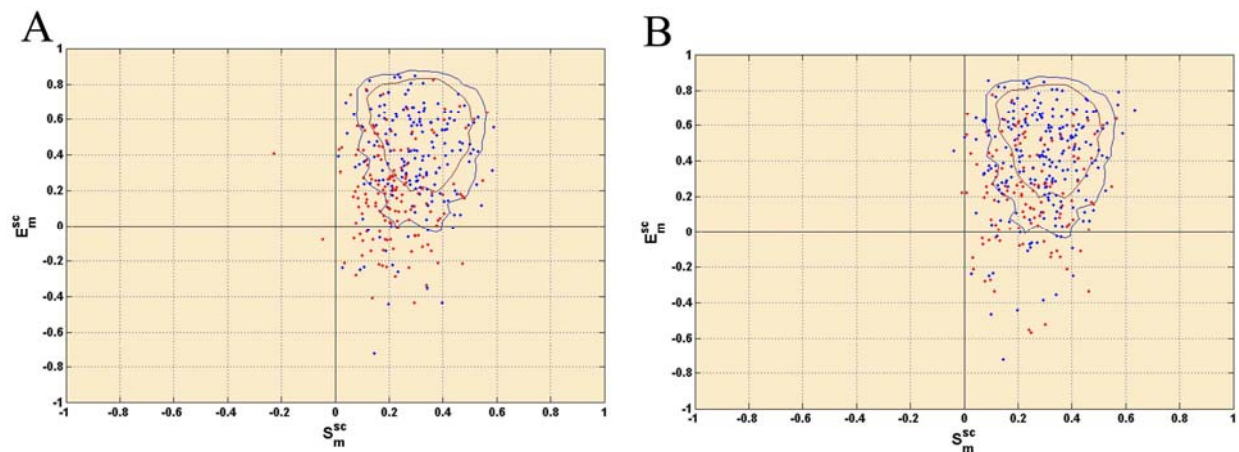

**Figure S11. Distribution of points in CP3.** Distribution of points corresponding to residues with coordinate errors in the superseded (plotted in blue) and the same residues in the upgraded structures (red) for CP2 ( $0.15 < \text{Bur} \leq 0.3$ ). In **(A)** the erroneous residues have been detected by method 1 (side chain rmsd) and in **(B)** by method 2 ( $\chi_1$  torsion) (see **Main Text**).



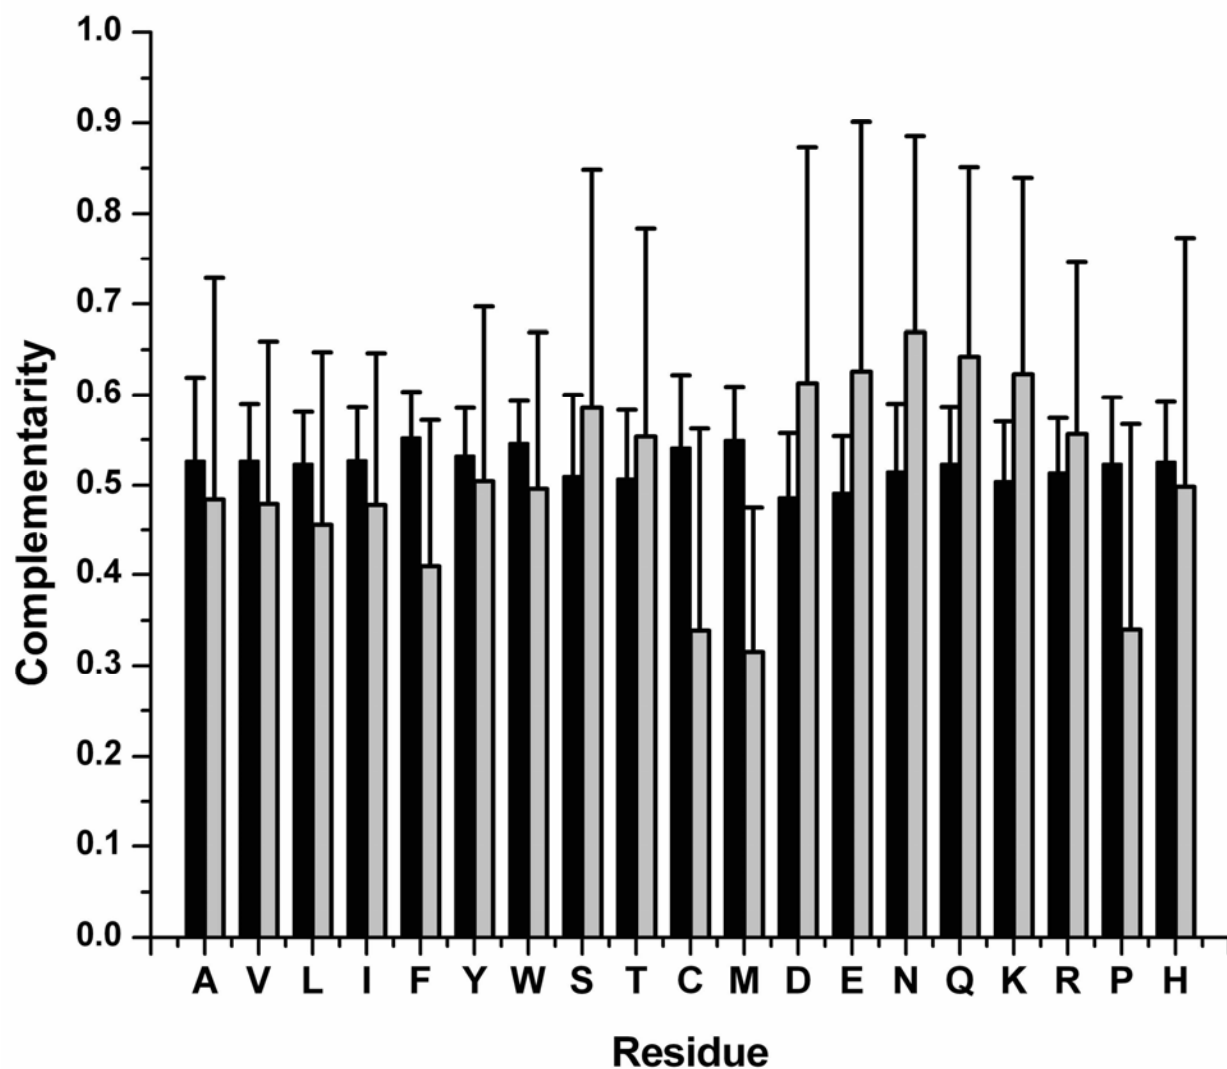

**Figure S12. Trends in surface and electrostatic complementarities for completely buried amino acid side chains.** Mean  $\overline{S}_m^{sc}$  (black),  $\overline{E}_m^{sc}$  (gray), plotted as filled thick bars along with their standard deviations (represented by error bars) for different residues in the 1<sup>st</sup> burial bin ( $0.0 \leq \text{Bur} \leq 0.05$ ).

**Table S14. Comparison of the values between electrostatic and shape complementarities.**

Mean  $\overline{E}_m^{sc}$ ,  $\overline{S}_m^{sc}$  and their standard deviations (in parentheses) tabulated for different amino acid residues distributed in three burial bins (bin1:  $0.00 \leq \text{Bur} \leq 0.05$ ; bin2:  $0.05 < \text{Bur} \leq 0.15$ ; bin3:  $0.15 < \text{Bur} \leq 0.30$ ) where ‘Bur’ stands for the burial ratio (see **Main Text**).

| Residue | $\overline{E}_m^{sc}$ |             |             | $\overline{S}_m^{sc}$ |             |             |
|---------|-----------------------|-------------|-------------|-----------------------|-------------|-------------|
|         | bin1                  | bin2        | bin3        | bin1                  | bin2        | bin3        |
| ALA     | 0.48 (0.25)           | 0.46 (0.25) | 0.50 (0.26) | 0.53 (0.09)           | 0.43 (0.12) | 0.30 (0.15) |
| VAL     | 0.48 (0.18)           | 0.45 (0.17) | 0.46 (0.18) | 0.53 (0.06)           | 0.45 (0.08) | 0.35 (0.11) |
| LEU     | 0.46 (0.19)           | 0.41 (0.20) | 0.43 (0.21) | 0.52 (0.06)           | 0.45 (0.08) | 0.34 (0.10) |
| ILE     | 0.48 (0.17)           | 0.43 (0.18) | 0.46 (0.18) | 0.53 (0.06)           | 0.46 (0.08) | 0.35 (0.10) |
| PHE     | 0.41 (0.16)           | 0.40 (0.18) | 0.42 (0.18) | 0.55 (0.05)           | 0.49 (0.07) | 0.40 (0.10) |
| TYR     | 0.50 (0.19)           | 0.48 (0.20) | 0.45 (0.20) | 0.53 (0.05)           | 0.46 (0.07) | 0.36 (0.09) |
| TRP     | 0.50 (0.17)           | 0.46 (0.20) | 0.47 (0.18) | 0.55 (0.05)           | 0.48 (0.06) | 0.38 (0.09) |
| SER     | 0.59 (0.26)           | 0.54 (0.28) | 0.54 (0.29) | 0.51 (0.09)           | 0.41 (0.12) | 0.28 (0.14) |
| THR     | 0.55 (0.23)           | 0.54 (0.24) | 0.52 (0.26) | 0.51 (0.08)           | 0.42 (0.10) | 0.30 (0.12) |
| CYS     | 0.35 (0.22)           | 0.32 (0.20) | 0.29 (0.23) | 0.54 (0.08)           | 0.45 (0.12) | 0.34 (0.14) |
| MET     | 0.32 (0.16)           | 0.28 (0.15) | 0.27 (0.15) | 0.55 (0.06)           | 0.46 (0.08) | 0.33 (0.11) |
| ASP     | 0.61 (0.26)           | 0.63 (0.22) | 0.63 (0.23) | 0.49 (0.07)           | 0.39 (0.09) | 0.26 (0.10) |
| GLU     | 0.63 (0.28)           | 0.61 (0.22) | 0.57 (0.22) | 0.49 (0.06)           | 0.39 (0.08) | 0.27 (0.09) |
| ASN     | 0.67 (0.22)           | 0.63 (0.27) | 0.59 (0.25) | 0.52 (0.07)           | 0.43 (0.09) | 0.31 (0.11) |
| GLN     | 0.64 (0.21)           | 0.63 (0.19) | 0.53 (0.23) | 0.52 (0.06)           | 0.42 (0.08) | 0.30 (0.10) |
| LYS     | 0.62 (0.22)           | 0.56 (0.25) | 0.51 (0.23) | 0.50 (0.07)           | 0.42 (0.08) | 0.30 (0.10) |
| ARG     | 0.56 (0.19)           | 0.60 (0.19) | 0.58 (0.19) | 0.51 (0.06)           | 0.43 (0.08) | 0.30 (0.10) |
| PRO     | 0.34 (0.23)           | 0.38 (0.21) | 0.40 (0.22) | 0.52 (0.07)           | 0.43 (0.10) | 0.31 (0.12) |
| HIS     | 0.50 (0.28)           | 0.50 (0.25) | 0.46 (0.29) | 0.53 (0.07)           | 0.45 (0.08) | 0.34 (0.10) |

## References

1. Basu, S., D. Bhattacharya, and R. Banerjee. 2011. Mapping the distribution of packing topologies within protein interiors shows predominant preference for specific packing motifs. *BMC Bioinformatics*. 12:195.
2. Holm, L., and C. J. Sander. 1992. Evaluation of protein models by atomic solvation preference. *J Mol Biol*. 225:93-105.
3. Branden, C. I., and T. A. Jones. 1990. Between objectivity and subjectivity. *Nature*. 343:687-689.
4. Avbelj, F., J. Moult, D. H. Kitson, M. N. James, and A. T. Hagler. 1990. Molecular dynamics study of the structure and dynamics of a protein molecule in a crystalline ionic environment, *Streptomyces griseus* protease A. *Biochemistry*. 29:8658-8676.
5. Bahadur, R. P., and P. Chakrabarti. 2009. Discriminating the native structure from decoys using scoring functions based on the residue packing in globular proteins. *BMC Structural Biology*. 9:76.
6. Samudrala, R., and J. Moult. 1998. An all-atom distance-dependent conditional probability discriminatory function for protein structure prediction. *J. Mol. Biol*. 275:895-916.
7. Arab, S., M. Sadeghi, C. Eslahchi, H. Pezeshk, and A. Sheari. 2010. A pairwise residue contact area-based mean force potential for discrimination of native protein structure. *BMC Bioinformatics*. 11:16.
8. Lu, H., and J. Skolnick. 2001. A distance-dependent atomic knowledge based potential for improved protein structure selection. *Proteins*. 44:223-232.
9. Skolnick, J., A. Kolinski, A. Ortiz. 2000. Derivation of protein-specific pair potentials based on weak sequence fragment similarity. *Proteins*. 38:3-16.
10. Park, B., and M. Levitt. 1996. Energy functions that discriminate X-ray and near-native folds from well-constructed decoys. *J Mol Biol*, 258:367-392.
11. Simons, K. T., C. Kooperberg, E. Huang, and D. Baker. 1997. Assembly of protein tertiary structures from fragments with similar local sequences using simulated annealing and Bayesian scoring functions. *J. Mol. Biol*. 268:209-225.
12. Zhang, C., S. Liu, H. Zhou, and Y. Zhou. 2004. An accurate, residue-level, pair potential of mean force for folding and binding based on the distance-scaled, ideal-gas reference state. *Protein Sci*. 13:400-411.
13. Misura, K. M., D. Chivian, C. A. Rohl, D. E. Kim, and D. Baker. 2006. Physically realistic homology models built with ROSETTA can be more accurate than their templates. *Proc. Natl. Acad. Sci. USA*. 103:5361-5366.
14. Melo, F., R. Sanchez, and A. Sali. 2002. Statistical potentials for fold assessment. *Protein Sci*. 11:430-448.
15. Li, X., C. Hu, and J. Liang. 2003. Simplicial edge representation of protein structures and alpha contact potential with confidence measure. *Proteins*. 53:792-805.
16. Mirzaie, M., C. Eslahchi, H. Pezeshk, and M. Sadeghi. 2009. A distance-dependent atomic knowledge-based potential and force for discrimination of native structures from decoys. *Proteins*. 77:454-463.
17. Shen, M. Y., and A. Sali. 2006. Statistical potential for assessment and prediction of protein structures. *Protein Sci*. 15:2507-2524.

18. Miyazawa, S., and R. L. Jernigan. 1996. Residue-residue potentials with a favorable contact pair term and an unfavorable high packing density term, for simulation and threading. *J. Mol. Biol.* 256:623-644.
19. Samudrala, R., and M. Levitt. 2000. Decoys 'R' Us: a database of incorrect conformation to improve protein structure prediction. *Protein Sci.* 9:1399-1401.
20. Tsai, J., R. Bonneau, A. V. Morozov, B. Kuhlman, C. A. Rohl, and D. Baker. 2003. An improved protein decoy set for testing energy functions for protein structure prediction. *Proteins*, 53:76-87.
21. Moulton, J., K. Fidelis, A. Kryzhanovych, and A. Tramontano. 2011. Critical assessment of methods of protein structure prediction (CASP)—Round IX Proteins 79 (Suppl 10):1–5.
22. Holm, L., and P. Rosenstrom. 2010. Dali server: conservation mapping in 3D. *Nuc. Acids. Res.* 38:W545-549.
23. Krivov, G. G., M. V. Shapovalov, and R. L. Dunbrack. 2009. Improved prediction of protein side-chain conformations with SCWRL4. *Proteins*. 77:778-795.
24. Edgar, R. C., 2004. MUSCLE: multiple sequence alignment with high accuracy and high throughput. *Nuc. Acids. Res.* 32:1792-1797.
